# Supplementary material for: Modelling biodegradability based on OECD 301D data for the design of mineralising ionic liquids
Source: Royal Society of Chemistry journal article supplement (doi:10.1039/d4gc00889h), 2024-01-01
Supplement: d4gc00889h1.pdf [file d4gc00889h1.pdf]

## Supporting Information

# Modelling biodegradability based on OECD 301D data for the design of mineralising ionic liquids

*Ann-Kathrin Amsel<sup>a,b</sup>, Suman Chakravarti<sup>c</sup>, Oliver Olsson<sup>a</sup>, Klaus Kümmeler<sup>a,b,\*</sup>*

<sup>a</sup>Institute of Sustainable Chemistry, Leuphana University of Lüneburg, Universitätsallee 1,  
21335 Lüneburg, Germany

<sup>b</sup>Research and Education Hub, International Sustainable Chemistry Collaborative Centre  
(ISC3), Leuphana University of Lüneburg, Universitätsallee 1, 21335 Lüneburg, Germany

<sup>c</sup>MultiCASE Inc., 5885 Landerbrook Dr. #210, Mayfield Heights, OH 44124 USA, United States

\* e-mail corresponding author: [klaus.kuemmerer@leuphana.de](mailto:klaus.kuemmerer@leuphana.de)

|                                                                                                    |    |
|----------------------------------------------------------------------------------------------------|----|
| 1. Model building.....                                                                             | 3  |
| 1.1 Canonical representation of substructures .....                                                | 5  |
| 1.2 Descriptors used for the model IL_FP_cont.....                                                 | 6  |
| 1.3 Fragments used for the models IL_AI_cont, IL_AI_class, ILNI_AI_cont and<br>ILNI_AI_class ..... | 7  |
| 2. Model validation.....                                                                           | 14 |
| 3. Clustering.....                                                                                 | 20 |
| References.....                                                                                    | 37 |

|                                                                                                                    |    |
|--------------------------------------------------------------------------------------------------------------------|----|
| Figure S1: Predicted vs. experimental biodegradation rates for the IL_train_set of the model<br>IL_FP_cont. ....   | 16 |
| Figure S2: Predicted vs. experimental biodegradation rates for the IL_test_set of the model<br>IL_FP_cont. ....    | 17 |
| Figure S3: Predicted vs. experimental biodegradation rates for the IL_train_set of the model<br>IL_AI_cont.....    | 17 |
| Figure S4: Predicted vs. experimental biodegradation rates for the IL_test_set of the model<br>IL_AI_cont.....     | 18 |
| Figure S5: Predicted vs. experimental biodegradation rates for the IL_train_set of the model<br>ILNI_AI_cont. .... | 18 |
| Figure S6: Predicted vs. experimental biodegradation rates for the IL_test_set of the model<br>ILNI_AI_cont. ....  | 19 |

|                                                                                                                       |    |
|-----------------------------------------------------------------------------------------------------------------------|----|
| Table S1: Description of atom types. ....                                                                             | 5  |
| Table S2: Regression coefficients for the 61 elements of the fingerprint used for the model<br>IL_FP_cont.....        | 6  |
| Table S3: Regression constant and alerts for the model IL_AI_cont and the related regression<br>coefficients .....    | 7  |
| Table S4: Regression constant and alerts for the model IL_AI_class and the related regression<br>coefficients .....   | 9  |
| Table S5: Regression constant and alerts for the model ILNI_AI_cont and the related<br>regression coefficients .....  | 10 |
| Table S6: Regression constant and alerts for the model ILNI_AI_class and the related<br>regression coefficients. .... | 13 |
| Table S7: Performance measures and equations.....                                                                     | 16 |
| Table S8: Compliance of models with OECD principles for validating (Q)SAR models.....                                 | 19 |
| Table S9: tSNE coordinates for tSNE plot train_set_IL.....                                                            | 20 |
| Table S10: tSNE coordinates for tSNE plot train_set_ILNI. ....                                                        | 27 |

## 1. Model building

The ILs are multicomponent and charged compounds. This prevents calculation of conventional descriptors that are used traditionally in building (Q)SAR models, *e.g.* LogP, water solubility. Formal charges also exclude availability of required parameters for calculating descriptors which are otherwise available for uncharged compounds. Hence, only fragment descriptors were used. For fragmentation, widely accepted extended connectivity fingerprint (ECFP) type circular fragments up to a bond depth of 5 from the center atom were used.<sup>1</sup> Fragments were generated from both the anion and cation parts of each chemical. A canonical representation of the fragments was used, which was applied in Chakravarti *et al.*<sup>2</sup> The canonical representation ensures unique representation of a particular substructure invariant from the atom ordering. A SMILES like syntax for easy interpretation was maintained. It contains more information on atomic level to prevent loss of structural environment context which happens with SMILES representation of fragments.<sup>3</sup> Atoms are annotated with hybridisation, number of hydrogens, formal charge, etc.<sup>3</sup> For example C2 represents sp<sup>2</sup> hybridised non-ring carbon and C3H2 sp<sup>3</sup> hybridised carbon with two hydrogens in this fragment [C2]-[C3H2]-[C3H]. The description of the atom types is available in Table S1.

Two types of fragment descriptors were used: i. fragments based on ECFP type circular fragments as described above and ii. element of fingerprint. A special continuous valued fingerprint developed by Chakravarti<sup>3</sup> was used on the individual components of an IL separately and combined to give a final fingerprint of 600 elements. The fingerprints are distributed representations of fragments. One fragment can potentially affect all the 600 elements of the fingerprint. Every element of the fingerprint is a decimal point number and can be positive as well as negative.<sup>3</sup>

The variable selection picked those fragments that were relevant to the biodegradability potential of the training chemicals. The L1 regularisation/Lasso regression via the “R” package *glmnet* was used for this purpose.<sup>4,5</sup> The specific criteria to assess the relevance of fragments to the biodegradability potential was mean squared error of the observed and predicted biodegradability. Variable selection was performed separately for binary classification (logistic) and continuous regression models. The selected fragments were considered to be the privileged substructures, *i.e.* relevant to biodegradability potential of ILs. In addition to the variable selection, L1 regularisation/Lasso regression produces regression coefficients for the selected fragments. Positive and negative regression coefficients are indicative of fragments that favour and decrease biodegradability, respectively.

## 1.1 Canonical representation of substructures

Table S1: Description of atom types.

| FRAGMENT | DESCRIPTION                                                                  |
|----------|------------------------------------------------------------------------------|
| C1       | sp hybridised non-ring carbon                                                |
| C2       | sp <sup>2</sup> hybridised non-ring carbon                                   |
| C2H      | sp <sup>2</sup> hybridised non-ring carbon with one hydrogen                 |
| C3       | sp <sup>3</sup> hybridised non-ring carbon                                   |
| C3H      | sp <sup>3</sup> hybridised non-ring carbon with one hydrogen                 |
| C3H2     | sp <sup>3</sup> hybridised carbon with two hydrogens                         |
| C3H3     | sp <sup>3</sup> hybridised non-ring carbon with three hydrogens              |
| O2       | sp <sup>2</sup> hybridised oxygen                                            |
| O2-      | sp <sup>2</sup> hybridised oxygen negatively charged                         |
| O3       | sp <sup>3</sup> hybridised oxygen                                            |
| O3H      | sp <sup>3</sup> hybridised oxygen with one hydrogen                          |
| N2-      | sp <sup>2</sup> hybridised non-ring nitrogen negatively charged              |
| N2_1     | sp <sup>2</sup> hybridised nitrogen with one double bond                     |
| N3       | sp <sup>3</sup> hybridised nitrogen                                          |
| N3+      | sp <sup>3</sup> hybridised nitrogen positively charged                       |
| N3H      | sp <sup>3</sup> hybridised nitrogen with one hydrogen                        |
| N3H2     | sp <sup>3</sup> hybridised nitrogen with two hydrogens                       |
| N3H2+    | sp <sup>3</sup> hybridised nitrogen with two hydrogens, positively charged   |
| N3H3+    | sp <sup>3</sup> hybridised nitrogen with three hydrogens, positively charged |
| F3       | sp <sup>3</sup> hybridised fluorine                                          |
| S3       | sp <sup>3</sup> hybridised sulphur                                           |
| S3H      | sp <sup>3</sup> hybridised sulphur with one hydrogen                         |
| S3_2     | sp <sup>3</sup> hybridised sulphur with two double bonds                     |
| c        | aromatic carbon                                                              |
| c.       | aromatic carbon on a ring joint                                              |
| cH       | aromatic carbon with one hydrogen                                            |
| n        | aromatic nitrogen                                                            |
| n+       | aromatic nitrogen positively charged                                         |
| nH       | aromatic nitrogen with one hydrogen                                          |
| Cl3-     | sp <sup>3</sup> hybridised chlorine negatively charged                       |

## 1.2 Descriptors used for the model IL\_FP\_cont

Table S2: Regression coefficients for the 61 elements of the fingerprint used for the model IL\_FP\_cont. Regression coefficient indicates contribution towards biodegradation (higher = more biodegradable).

| VARIABLE_NAME | REGRESSION_COEFFICIENT | VARIABLE_NAME | REGRESSION_COEFFICIENT |
|---------------|------------------------|---------------|------------------------|
| intercept     | 42.4631                | BIN_409       | -0.7423                |
| BIN_22        | -0.9802                | BIN_410       | 0.4150                 |
| BIN_76        | -5.1607                | BIN_421       | 0.1057                 |
| BIN_80        | -6.8303                | BIN_423       | -0.1657                |
| BIN_82        | 2.8263                 | BIN_425       | 0.0801                 |
| BIN_153       | -2.5154                | BIN_429       | -0.0437                |
| BIN_158       | -0.4383                | BIN_452       | -0.1209                |
| BIN_159       | -0.6025                | BIN_456       | 1.9117                 |
| BIN_161       | 4.0727                 | BIN_458       | -0.4272                |
| BIN_208       | -1.4189                | BIN_469       | -0.2436                |
| BIN_236       | -5.0643                | BIN_480       | 0.7530                 |
| BIN_253       | 0.0578                 | BIN_484       | -0.3183                |
| BIN_272       | -2.2881                | BIN_503       | 2.6264                 |
| BIN_284       | -1.5153                | BIN_512       | -1.9509                |
| BIN_293       | 1.7894                 | BIN_521       | 0.1557                 |
| BIN_305       | 1.0973                 | BIN_530       | -0.5392                |
| BIN_311       | 0.3026                 | BIN_531       | -2.1854                |
| BIN_331       | 1.9854                 | BIN_533       | -0.0477                |
| BIN_349       | -9.3207                | BIN_558       | 1.1936                 |
| BIN_351       | -0.4624                | BIN_562       | -2.1410                |
| BIN_355       | 0.7128                 | BIN_569       | -0.1680                |
| BIN_356       | 1.5193                 | BIN_570       | -0.9162                |
| BIN_358       | -0.9837                | BIN_572       | -0.2513                |
| BIN_363       | 0.8734                 | BIN_573       | -2.0735                |
| BIN_364       | -0.4064                | BIN_576       | -3.7916                |
| BIN_377       | -0.3324                | BIN_577       | -1.1347                |
| BIN_379       | 0.0826                 | BIN_582       | 0.7411                 |
| BIN_387       | 3.9337                 | BIN_583       | -6.4103                |
| BIN_394       | -0.6601                | BIN_594       | 0.0412                 |
| BIN_399       | -1.8238                | BIN_595       | -0.1719                |
| BIN_403       | -2.3152                | BIN_599       | -1.3475                |

### 1.3 Fragments used for the models IL\_AI\_cont, IL\_AI\_class, ILNI\_AI\_cont and ILNI\_AI\_class

Table S3: Regression constant and alerts for the model IL\_AI\_cont and the related regression coefficients. Regression coefficient indicates contribution towards biodegradation (higher = more biodegradable). Canonical representation of the fragments was chosen to show hybridization, number of hydrogens, formal charge.

| ID | ALERT                                                                                                    | REGRESSION_COEFFICIENT |
|----|----------------------------------------------------------------------------------------------------------|------------------------|
|    | CONSTANT                                                                                                 | 24.0910                |
| 1  | [O2]                                                                                                     | 2.1627                 |
| 2  | [c](:[cH])(:[cH])-[C2]                                                                                   | 8.5377                 |
| 3  | [O2-]                                                                                                    | 6.5249                 |
| 4  | [N3H2]                                                                                                   | 5.5314                 |
| 5  | [S3H]                                                                                                    | -1.9374                |
| 6  | [C2]-[O2-]                                                                                               | 0.2842                 |
| 7  | [C3H2]-[C3H2]-[n]                                                                                        | -2.1521                |
| 8  | [cH](:[n]):[n+]                                                                                          | -3.5515                |
| 9  | [C2](=[O2])(-[C3H])-[O2-]                                                                                | 0.2061                 |
| 10 | [C3H2]-[C3H2]-[C3H2]-[C3H2]-[C3H3]                                                                       | 2.9806                 |
| 11 | [C3H3]-[n+]:[cH]:[cH]:[n]:[cH]1                                                                          | -8.1990                |
| 12 | [C3H2]-[C3H2]-[O3]                                                                                       | 3.0842                 |
| 13 | [C1]-[C3H2]-[n]                                                                                          | 1.3233                 |
| 14 | [N2-]-[S3]-[S3]                                                                                          | 10.3149                |
| 15 | [C1]-[C3H2]-[n]:[cH]:[cH]:[n+](:[cH]1)-[C3H2]                                                            | 2.4854                 |
| 16 | [C3](-[F3])(-[F3])(-[F3])-[S3](=[O2])(=[O2])-[N2-]-[S3]                                                  | 3.2426                 |
| 17 | [Cl3-]                                                                                                   | 9.0035                 |
| 18 | [c](:[cH])(:[cH])-[C3H3]                                                                                 | 2.2331                 |
| 19 | [C3H2](-[C3H2]-[C3H3])-[C3H2]-[n+]                                                                       | -9.4859                |
| 20 | [C3H2]-[C3H2]-[C3H2]-[n+](:[cH]):[cH]                                                                    | -0.5450                |
| 21 | [c]:[cH]:[cH]:[n+](:[cH])-[C3H2]                                                                         | -9.0554                |
| 22 | [c](:[cH]:[cH])(:[cH]:[cH])-[C3H3]                                                                       | 0.2878                 |
| 23 | [C3H2]-[C3H2]-[n+](:[cH]:[cH]):[cH]:[cH]                                                                 | -5.2058                |
| 24 | [C3H2]-[C3H2]-[N3+]                                                                                      | -0.2294                |
| 25 | [C2](=[O2])(-[C3H2]-[N3+])-[N3H]-[C3H]                                                                   | -3.6574                |
| 26 | [c](:[cH]:[cH])(:[cH]:[cH])-[C3H2]-[C3H](-[C2](=[O2])-[O3]-[C3H2]-[C3H3])-[N3H]-[C2](=[O2])-[C3H2]-[N3+] | -1.6884                |
| 27 | [C2]-[C3H2]-[C3H]                                                                                        | 4.4449                 |
| 28 | [C3H]-[C3H2]-[C3H2]                                                                                      | 0.6055                 |
| 29 | [C3H2]-[N3+](-[C3H3])(-[C3H3])-[C3H3]                                                                    | 33.1433                |
| 30 | [C2](=[O2])(-[C3H2]-[n+]:[cH]:[cH]:[n](:[cH]1)-[C3H3])-[N3H]                                             | 3.6090                 |
| 31 | [c]-[C3H2]-[C3H](-[C2](=[O2])-[O3])-[N3H]-[C2](=[O2])-[C3H2]-[n+]                                        | 5.6214                 |
| 32 | [C2]-[C3H](-[C3H2])-[N3H]-[C2](=[O2])-[C3H2]-[n+]:[cH]:[cH]:[n](:[cH]1)-[C3H3]                           | 0.1124                 |
| 33 | [C3H2]-[C3H2]-[C3H2]-[C3H2]-[C3H2]-[C3H2]-[C3H3]                                                         | 1.0807                 |
| 34 | [C3H2]-[C3H2]-[C3H2]-[C3H2]-[C3H2]-[C3H2]-[C3H2]-[C3H3]                                                  | 4.9162                 |

|    |                                                                                                         |          |
|----|---------------------------------------------------------------------------------------------------------|----------|
| 35 | [C3H2]-[C3H2]-[C3H2]-[C3H2]-[C3H2]-[C3H2]-[C3H2]-[C3H2]-[C3H2]-[C3H2]-[C3H2]                            | -19.5037 |
| 36 | [C2]-[O3]-[C3H2]-[C3H2]-[C3H2]-[C3H2]-[C3H2]-[C3H2]-[C3H2]-[C3H2]-[C3H2]                                | -4.9086  |
| 37 | [C3H]-[O3H]                                                                                             | 1.0669   |
| 38 | [C3H](-[C3H2])(-[C3H2])-[O3H]                                                                           | 2.6522   |
| 39 | [C3H2]-[N3+](-[C3H2])(-[C3H2])-[C3H2]                                                                   | -14.6970 |
| 40 | [C3H2]-[C3H2]-[C3H2]-[N3+](-[C3H2])(-[C3H2])-[C3H2]                                                     | -4.5986  |
| 41 | [C3H2]-[C3H2]-[N3+](-[C3H2]-[C3H2])(-[C3H2]-[C3H2])-[C3H2]-[C3H2]-[C3H2]-[C3H3]                         | -0.3843  |
| 42 | [C3H]1-[C3H2]-[C3H2]-[C3H2]-[N3H]1                                                                      | 7.3152   |
| 43 | [c](:[cH])(:[cH])-[O3]                                                                                  | -9.1273  |
| 44 | [c](:[cH]:[cH])(:[cH]:[cH])-[C3H2]-[C3H](-[C2](=[O2])-[O3]-[C3H2]-[C3H3])-[N3H]-[C2](=[O2])-[C3H2]-[n+] | 5.7458   |
| 45 | [N2]-[O3H]                                                                                              | -3.1732  |
| 46 | [C2]-[N3H]-[C3H2]                                                                                       | -10.9595 |
| 47 | [C2H]=[N2]-[O3H]                                                                                        | -0.1178  |
| 48 | [C2](=[O2])(-[C3H])-[N3H]-[C3H2]-[C3H2]                                                                 | -2.1971  |
| 49 | [C3H3]-[N3]                                                                                             | -1.1983  |
| 50 | [C3H2](-[C3H3])-[n]                                                                                     | -10.2854 |
| 51 | [C2]-[C3H2]-[N3]                                                                                        | 32.0454  |
| 52 | [C2]-[C3H2]-[C3H2]                                                                                      | 2.0551   |
| 53 | [C2](=[O2])(-[C3H2]-[N3])-[O2-]                                                                         | 0.3289   |
| 54 | [C2](=[O2])(-[C3H2]-[C3H2]-[C3H2])-[N3]                                                                 | 1.1893   |
| 55 | [C2]-[C3H2]-[N3](-[C2](=[O2])-[C3H2])-[C3H3]                                                            | 0.8998   |
| 56 | [C2]-[C3H](-[C3H2])-[N3+]                                                                               | -2.0347  |
| 57 | [C3H]1-[C3H2]-[C3H2]-[C3H2]-[N3+]                                                                       | -0.1403  |
| 58 | [C3H2]-[C3H2]-[C3H2]-[C3H2]-[C3H2]-[C3H2]-[C3H2]-[O3]-[C3H2]                                            | 3.2256   |
| 59 | [C3H2]-[C3H2]-[C3H2]-[C3H2]-[C3H2]-[C3H2]-[C3H2]-[C3H2]-[C3H2]-[O3]-[C3H2]                              | 0.1154   |
| 60 | [C3H2]-[C3H2]-[C3H2]-[C3H2]-[C3H2]-[C3H2]-[C3H2]-[C3H2]-[O3]-[C3H2]-[n+]                                | 0.4979   |
| 61 | [C2](=[O2])(-[C3H2]-[n])-[O3]-[C3H2]                                                                    | 1.3243   |
| 62 | [C2](=[O2])(-[C3H2]-[n])-[O3]-[C3H2]-[C3H2]-[C3H2]                                                      | 0.9451   |
| 63 | [C2]-[O3]-[C3H2]-[C3H2]-[C3H2]-[C3H2]-[C3H2]-[C3H3]                                                     | 4.1352   |
| 64 | [c]:[n+](:[cH])-[C3H3]                                                                                  | -4.7922  |
| 65 | [c]-[C3H](-[C2])-[n+]                                                                                   | -7.2859  |
| 66 | [c](:[cH])(:[cH])-[C3H]                                                                                 | -0.3177  |
| 67 | [C3H]-[n+](:[cH]):[cH]                                                                                  | -0.1892  |
| 68 | [c]1(:[cH]:[cH]:[cH]:[cH]:[cH]1)-[C3H]                                                                  | -0.2379  |
| 69 | [Al-]                                                                                                   | -13.4799 |
| 70 | [C3]-[C3H](-[C3])-[O3]                                                                                  | -0.5482  |



Table S4: Regression constant and alerts for the model IL\_AI\_class and the related regression coefficients. Regression coefficient indicates contribution towards biodegradation (higher = more biodegradable). Canonical representation of the fragments was chosen to show hybridization, number of hydrogens, formal charge.

| ID | ALERT                                                                                             | REGRESSION_COEFFICIENT |
|----|---------------------------------------------------------------------------------------------------|------------------------|
|    | CONSTANT                                                                                          | -3.1179                |
| 1  | [C3H2]-[C3H3]                                                                                     | -0.0525                |
| 2  | [C2]-[O3H]                                                                                        | 0.2724                 |
| 3  | [c](:[cH])(:[cH])-[C2]                                                                            | 0.2820                 |
| 4  | [n]                                                                                               | -0.0839                |
| 5  | [C3H3]-[n+]1:[cH]:[cH]:[n]:[cH]1                                                                  | -0.3010                |
| 6  | [C3H2]-[n]1:[cH]:[cH]:[n+](:[cH]1)-[C3H3]                                                         | -0.0223                |
| 7  | [C3H2]-[C3H2]-[n+]                                                                                | 0.1855                 |
| 8  | [C1]-[C3H2]-[n]                                                                                   | 1.0130                 |
| 9  | [N2]-(-[S3_2])-[S3_2]                                                                             | 2.6090                 |
| 10 | [C3H2](-[C3H2]-[O3])-[n+](:[cH]):[cH]                                                             | 0.0846                 |
| 11 | [C3](-[F3])(-[F3])(-[F3])-[S3_2](=[O2])(=[O2])-[N2-]                                              | 0.0483                 |
| 12 | [C1](#[N1])-[C3H2]-[n]1:[cH]:[cH]:[n+](:[cH]1)-[C3H2]                                             | 0.0157                 |
| 13 | [C3]-[S3_2](=[O2])(=[O2])-[N2-]-[S3_2](=[O2])(=[O2])-[C3](-[F3])(-[F3])-[F3]                      | 0.0142                 |
| 14 | [C3](-[F3])(-[F3])(-[F3])-[S3_2](=[O2])(=[O2])-[N2-]-[S3_2](=[O2])(=[O2])-[C3](-[F3])(-[F3])-[F3] | 0.0014                 |
| 15 | [C3H2]-[N3+](-[C3H3])(-[C3H3])-[C3H3]                                                             | 5.7231                 |
| 16 | [C3H2]1-[C3H2]-[C3H2]-[N3+]-[C3H2]1                                                               | 0.4060                 |
| 17 | [C3H2]-[C3H2]-[C3H2]-[C3H2]-[C3H2]-[C3H2]-[C3H2]-[C3H2]-[C3H2]-[C3H2]-[C3H3]                      | 0.4129                 |
| 18 | [N3H2+]                                                                                           | 3.1941                 |
| 19 | [C2](=[O2])(-[C3H3])-[O2-]                                                                        | 0.0551                 |
| 20 | [C2]-[C3H2]-[N3]                                                                                  | 3.3436                 |
| 21 | [C2](=[O2])(-[C3H2]-[C3H2]-[C3H2])-[N3]                                                           | 0.0208                 |
| 22 | [C2]-[N3](-[C3H2]-[C2](=[O2])-[O2-])-[C3H3]                                                       | 0.1072                 |
| 23 | [C2](=[O2])(-[C3H2]-[C3H2])-[N3](-[C3H2])-[C3H3]                                                  | 0.0065                 |
| 24 | [C2]-[C3H2]-[C3H2]-[C3H2]-[C3H2]-[C3H2]-[C3H2]-[C3H2]-[C3H2]                                      | 0.0599                 |
| 25 | [C2](=[O2])(-[C3H2]-[C3H2])-[N3](-[C3H2]-[C2](=[O2])-[O2-])-[C3H3]                                | 0.0037                 |
| 26 | [C3H2]-[N3+](-[C3H2])(-[C3H2]-[C3H2]-[C3H2]-[C3H3])-[C3H3]                                        | 0.3988                 |
| 27 | [C3H2]-[n+]1:[cH]:[cH]:[cH]:[cH]:[cH]1                                                            | 0.1337                 |
| 28 | [C2](=[O2])(-[C3H2]-[n+])-[O3H]                                                                   | 0.6031                 |
| 29 | [c]:[cH]:[cH]                                                                                     | -0.9396                |

Table S5: Regression constant and alerts for the model ILNI\_Al\_cont and the related regression coefficients. Regression coefficient indicates contribution towards biodegradation (higher = more biodegradable). Canonical representation of the fragments was chosen to show hybridization, number of hydrogens, formal charge.

| ID | ALERT                                                                                                      | REGRESSION_COEFFICIENT |
|----|------------------------------------------------------------------------------------------------------------|------------------------|
|    | REGRESSION_CONSTANT                                                                                        | 48.7302                |
| 1  | [C3H2]-[C3H2]-[N3H]-[C3H2]-[C3H2]                                                                          | 37.1426                |
| 2  | [C3H2]-[N3+]-[C3H3]-[C3H3]                                                                                 | 34.5821                |
| 3  | [c](:[cH])(:[cH]:[cH]:[cH])- [C2]                                                                          | 31.8354                |
| 4  | [C3H3]-[n+](:[cH]):[cH]:[cH]:[cH]                                                                          | 22.6716                |
| 5  | [C2]-[C3H2]-[N3]                                                                                           | 16.4266                |
| 6  | [C3H2]-[C3H2]-[C3H2]-[O3]-[S3_2]                                                                           | 15.0042                |
| 7  | [N3H3+]                                                                                                    | 14.7954                |
| 8  | [c](:[cH])(:[cH]:[cH]:[cH])- [O3H]                                                                         | 14.5016                |
| 9  | [C3H]-[C3H2]-[N3H]                                                                                         | 13.7104                |
| 10 | [C2]-[C3H](-[C3H2])- [N3H3+]                                                                               | 13.5572                |
| 11 | [C3H]1-[C3H2]-[C3H2]-[C3H2]-[N3H]1                                                                         | 12.6291                |
| 12 | [C2]-[C3H2]-[C3H2]-[C3H2]-[C3H2]                                                                           | 11.8645                |
| 13 | [c]-[C3H2]-[C3H](-[C2](=[O2]))-[O3]-[C3H2]-[C3H2]-[N3H]-[C2]                                               | 11.6728                |
| 14 | [C3H2]-[C3H2]-[N3H2]                                                                                       | 10.0375                |
| 15 | [C2]-[C3H2]-[C3H]                                                                                          | 9.9845                 |
| 16 | [C2]-[C3H2]-[C3H2]                                                                                         | 9.9586                 |
| 17 | [C2](=[O2])(-[C3H2]-[n+]1:[cH]:[cH]:[n](:[cH]1)-[C3H3])- [N3H]                                             | 9.4466                 |
| 18 | [C2]-[C3H3]                                                                                                | 9.0880                 |
| 19 | [C3](-[F3])(-[F3])(-[F3])- [S3_2]                                                                          | 8.9476                 |
| 20 | [C3H2](-[C3H2]-[C3H3])- [C3H2]-[O3]                                                                        | 8.2691                 |
| 21 | [C2]-[C3H]1-[C3H2]-[C3H2]-[C3H2]-[N3H]1                                                                    | 7.7071                 |
| 22 | [C2](=[O2])(-[C3H2]-[n+])- [N3H]-[C3H]                                                                     | 7.6261                 |
| 23 | [C2]-[O3H]                                                                                                 | 6.9449                 |
| 24 | [nH]                                                                                                       | 6.2442                 |
| 25 | [C2]-[N3H]-[C3H2]-[C3H2]-[C3H2]                                                                            | 6.1970                 |
| 26 | [c](:[cH]:[cH])(:[cH]:[cH])- [C3H2]-[C3H](-[C2](=[O2]))-[O3]-[C3H2]-[C3H3]- [N3H]-[C2](=[O2])- [C3H2]-[n+] | 6.0009                 |
| 27 | [C3H2]-[C3H2]-[O3]                                                                                         | 5.7721                 |
| 28 | [c]-[C3H2]-[C3H](-[C2](=[O2]))-[O3]-[N3H]-[C2](=[O2])- [C3H2]-[N3+]-[C3H2]- [C3H2](-[C3H3])- [C3H3]        | 5.2437                 |
| 29 | [C3H]-[C3H3]                                                                                               | 5.1976                 |
| 30 | [C3H2](-[C3H2]-[O3H])- [N3]                                                                                | 5.1923                 |
| 31 | [C3H2]-[C3H2]-[C3H2]-[O3]-[C3H2]                                                                           | 4.9450                 |
| 32 | [C3H]-[N3H2]                                                                                               | 4.7824                 |
| 33 | [C2](=[O2])(-[C3H])- [O3H]                                                                                 | 4.4935                 |
| 34 | [C2]-[O2-]                                                                                                 | 3.2180                 |
| 35 | [c]-[O3H]                                                                                                  | 3.0171                 |
| 36 | [C2]-[C3H](-[C3H2])- [N3H]                                                                                 | 2.7625                 |
| 37 | [C3H2]-[C3H2]-[C3H2]-[C3H2]-[C3H2]-[O3]-[S3_2]                                                             | 2.7288                 |
| 38 | [c]-[C3H](-[C2](=[O2]))-[O3]-[C3H2]-[n+]                                                                   | 2.3036                 |
| 39 | [c](:[cH])(:[cH])- [C3H](-[C2](=[O2]))-[O3]-[n+](:[cH]):[cH]                                               | 2.2482                 |

|    |                                                                                                                     |         |
|----|---------------------------------------------------------------------------------------------------------------------|---------|
| 40 | [C2](=[O2])(-[C3H2])-[O3]-[C3H2]-[C3H2]-[C3H2]-[C3H2]                                                               | 1.9281  |
| 41 | [C2](=[O2])(-[C3H2])-[O2-]                                                                                          | 1.6421  |
| 42 | [C3H2]-[C3H2]-[C3H2]-[C3H2]-[C3H2]-[O3]-[S3_2](=[O2])(=[O2])-[O2-]                                                  | 1.6211  |
| 43 | [O2-]                                                                                                               | 1.5824  |
| 44 | [c]-[C3H2]-[C3H]                                                                                                    | 1.4427  |
| 45 | [C2]-[C3H](-[C3H])-[N3H2]                                                                                           | 1.0532  |
| 46 | [C3H](-[C3H2])(-[C3H3])-[C3H3]                                                                                      | 0.9822  |
| 47 | [O3H]                                                                                                               | 0.9663  |
| 48 | [C2]-[O3]-[C3H2]                                                                                                    | 0.9394  |
| 49 | [C2]-[C3H2]-[C3H2]-[C3H2]-[C3H2]-[C3H2]-[C3H2]-[C3H2]-[C3H2]                                                        | 0.7255  |
| 50 | [c]-[C3H2]-[C3H](-[C2](=[O2])-[O3])-[N3H3+]                                                                         | 0.6869  |
| 51 | [O2]                                                                                                                | 0.5942  |
| 52 | [C2]-[C3H2]-[n+]:[cH]:[cH]:[cH]:[cH]:[cH]1                                                                          | 0.5225  |
| 53 | [C3H](-[C3H2])(-[C3H2])-[O3H]                                                                                       | 0.4354  |
| 54 | [c](:[cH])(:[cH])-[C3H2]-[C3H](-[C2](=[O2])-[O3]-[C3H2])-[N3H3+]                                                    | 0.4041  |
| 55 | [C2](=[O2])(-[C3H2]-[n+]:[cH]:[cH]:[n](:[cH]1)-[C3H3])-[N3H]-[C3H]                                                  | 0.4007  |
| 56 | [C2](=[O2])(-[C3H2]-[N3])-[O2-]                                                                                     | 0.3278  |
| 57 | [C2H]                                                                                                               | 0.2250  |
| 58 | [C3H3]-[N3]                                                                                                         | 0.1723  |
| 59 | [C2]-[N3](-[C3H2])-[C3H3]                                                                                           | 0.0970  |
| 60 | [C2](=[O2])(-[C3H2]-[C3H2]-[C3H2]-[C3H2])-[N3](-[C3H2])-[C3H3]                                                      | 0.0933  |
| 61 | [C2](=[O2])(-[C3H2])-[N3]                                                                                           | 0.0878  |
| 62 | [C3H2]-[C3H2]-[C3H2]-[C3H2]-[C3H2]-[C3H2]-[C3H2]-[O3]-[S3_2](=[O2])(=[O2])-[O2-]                                    | 0.0785  |
| 63 | [C2](=[O2])(-[C3H2]-[C3H2])-[N3](-[C3H2]-[C2](=[O2])-[O2-])-[C3H3]                                                  | 0.0749  |
| 64 | [c](:[cH])(:[cH])-[C3H2]-[C3H](-[C2](=[O2])-[O3]-[C3H2])-[N3H]-[C2](=[O2])-[C3H2]-[n+]:[cH]:[cH]:[n](:[cH]1)-[C3H3] | 0.0287  |
| 65 | [C2](=[O2])(-[C3H])-[O3]-[C3H2]-[C3H2]                                                                              | 0.0168  |
| 66 | [c](:[cH])(:[cH])-[C3H2]-[C3H](-[C2])-[N3H3+]                                                                       | 0.0146  |
| 67 | [C2](=[O2])(-[C3H2]-[C3H2]-[C3H2])-[N3]                                                                             | 0.0045  |
| 68 | [C2](=[O2])(-[C3H2]-[C3H2]-[C3H2]-[C3H2]-[C3H2])-[N3]                                                               | 0.0025  |
| 69 | [c]1(:[cH]:[cH]:[cH]:[cH]:[cH]1)-[C3H](-[C2](=[O2])-[O3])-[n+](:[cH]):[cH]                                          | 0.0015  |
| 70 | [cH]:[cH]:[cH]:[cH]:[cH]                                                                                            | 0.0006  |
| 71 | [C3H2]-[C3H2]-[N3+](-[C3H2]-[C3H2])(-[C3H2]-[C3H2])-[C3H2]-[C3H2]-[C3H2]-[C3H3]                                     | -0.0003 |
| 72 | [C2](=[C2H])(-[C3H3])-[O3]                                                                                          | -0.0010 |
| 73 | [c]-[C3H2]-[C3H](-[C2](=[O2])-[O3]-[C3H2]-[C3H2]-[C3H2]-[C3H2])-[N3H2]                                              | -0.0021 |
| 74 | [c]1:[cH]:[cH]:[cH]:[n+](:[cH]1)-[C3H2]-[C2]                                                                        | -0.0096 |
| 75 | [S3H]                                                                                                               | -0.0436 |
| 76 | [F3]                                                                                                                | -0.0848 |
| 77 | [c](:[cH]:[cH])(:[cH]:[cH])-[C3H2]-[C3H](-[C2](=[O2])-[O3]-[C3H2]-[C3H2]-[C3H2]-[C3H2])-[N3H2]                      | -0.0859 |
| 78 | [c](:[cH])(:[cH])-[C3H2]-[C3H](-[C2](=[O2])-[O3]-[C3H2]-[C3H2]-[C3H2]-[C3H2]-[C3H2])-[N3H2]                         | -0.1423 |
| 79 | [C3H2]-[N3+](-[C3H2])(-[C3H2])-[C3H3]                                                                               | -0.2261 |
| 80 | [C2]-[O3]-[C3H2]-[C3H2]-[C3H2]-[C3H2]-[C3H2]-[C3H2]-[C3H2]                                                          | -0.3859 |
| 81 | [C3H2]-[C3H2]-[C3H2]-[N3+](-[C3H2]-[C3H2]-[C3H2])(-[C3H2]-[C3H2]-[C3H2])-[C3H2]-[C3H2]-[C3H2]-[C3H2]                | -0.4731 |

|     |                                                                                                          |          |
|-----|----------------------------------------------------------------------------------------------------------|----------|
| 82  | [C3H2]-[C3H2]-[C3H2]-[N3+]-([C3H2]-[C3H2]-[C3H2])-( [C3H2]-[C3H2]-[C3H2])-[C3H2]-[C3H2]-[C3H2]-[C3H3]    | -0.8327  |
| 83  | [c]:[cH]:[n+]:([cH]:[cH])-[C3H2]-[C2]                                                                    | -0.9341  |
| 84  | [C3H2]-[C3H2]-[C3H2]-[C3H2]-[C3H2]-[C3H3]                                                                | -0.9760  |
| 85  | [c]1:[c]:([cH]:[cH]:[cH]:[cH]1)-[C2]                                                                     | -1.0763  |
| 86  | [C3H]-[C3H2]-[C3H2]-[C3H2]-[C3H2]                                                                        | -1.1152  |
| 87  | [C2](=[O2])-( [C3H2]-[n]:([cH]):[cH])-[O3]-[C3H2]-[C3H2]-[C3H3]                                          | -1.1682  |
| 88  | [C3H]-[C3H2]-[C3H2]                                                                                      | -1.5838  |
| 89  | [C3H2]-([C3H3])-[N3+]                                                                                    | -1.7078  |
| 90  | [C3H2]-[n]:([cH]):[cH]                                                                                   | -1.7293  |
| 91  | [C3H3]-[n+]                                                                                              | -1.7560  |
| 92  | [C3]-[F3]                                                                                                | -2.1666  |
| 93  | [C3H2]-[C3H2]-[N3+]                                                                                      | -2.6015  |
| 94  | [I3-]                                                                                                    | -2.7713  |
| 95  | [C3H2]-([C3H2]-[C3H2]-[C3H2]-[C3H3])-[C3H2]-[C3H2]-[C3H2]-[O3]                                           | -2.8595  |
| 96  | [c]:([cH]:[cH]):([cH]:[cH])-[C3H2]-[C3H](-[C2](=[O2])-[O3]-[C3H2]-[C3H3])-[N3H]-[C2](=[O2])-[C3H2]-[N3+] | -3.2251  |
| 97  | [C2]-[N2-]-[S3_2](=[O2])(=[O2])-[O3]-[C2]                                                                | -3.5590  |
| 98  | [c]:[c]:([cH]:[cH]:[cH])-[S3_2]                                                                          | -3.8670  |
| 99  | [Br3-]                                                                                                   | -4.3447  |
| 100 | [C3H2]-[N3H2]                                                                                            | -4.7930  |
| 101 | [Cl3-]                                                                                                   | -4.9373  |
| 102 | [c]:[c]:([cH])-[S3_2]                                                                                    | -5.0178  |
| 103 | [C2](=[O2])-( [C3H](-[C3H2])-[N3H2])-[O3]-[C3H2]-[C3H2]-[C3H2]-[C3H2]-[C3H2]                             | -5.1341  |
| 104 | [c]:[cH]:[cH]:[cH]:[n+]                                                                                  | -5.3127  |
| 105 | [C3H2]-[C3H2]-[C3H2]-[N3+]-([C3H2])-( [C3H2])-[C3H2]                                                     | -5.4589  |
| 106 | [C3H2]-([C3H2]-[C3H2]-[C3H2]-[C3H2]-[C3H3])-[C3H2]-[C3H2]-[C3H2]-[C3H2]-[O3]                             | -6.2131  |
| 107 | [N2_1]                                                                                                   | -6.3064  |
| 108 | [C2]-[O3]-[C3H2]-[C3H2]-[C3H2]-[C3H2]-[C3H2]-[C3H2]-[C3H2]-[C3H2]-[C3H2]                                 | -6.7569  |
| 109 | [C3H2]-[C3H2]-[O3H]                                                                                      | -7.1681  |
| 110 | [C3H2]-[C3H2]-[n]                                                                                        | -7.3933  |
| 111 | [N2-]-[S3_2](=[O2])(=[O2])-[O3]                                                                          | -7.8923  |
| 112 | [n]                                                                                                      | -8.7230  |
| 113 | [C2]-[O3]-[S3_2]                                                                                         | -9.7028  |
| 114 | [N3H]                                                                                                    | -10.2354 |
| 115 | [c]:[cH]:[cH]:[n+]:([cH])-[C3H2]                                                                         | -10.6381 |
| 116 | [C3H2]-[C3H2]-[C3H2]-[C3H2]-[C3H2]-[C3H2]-[C3H2]-[C3H2]-[C3H2]-[C3H2]-[C3H2]                             | -11.1189 |
| 117 | [C2]-[C2H]=[C2](-[C3H3])-[O3]-[S3_2]                                                                     | -11.2764 |
| 118 | [c]:[c]:([cH]:[cH]:[cH])-[C2]                                                                            | -12.5455 |
| 119 | [C3H2]-([C3H3])-[n]                                                                                      | -13.5779 |
| 120 | [C3H2]-([C3H2]-[C3H3])-[C3H2]-[n+]                                                                       | -13.7240 |
| 121 | [c]:([cH]):([cH])-[O3]                                                                                   | -13.7429 |
| 122 | [C3H2]-[N3+]-([C3H2])-( [C3H2])-[C3H2]                                                                   | -14.9098 |
| 123 | [C3H2]-[C3H2]-[N3]                                                                                       | -15.6074 |
| 124 | [N3+]                                                                                                    | -16.1439 |

|     |                                                                                           |          |
|-----|-------------------------------------------------------------------------------------------|----------|
| 125 | [n+]                                                                                      | -17.1591 |
| 126 | [c](:[cH])(:[cH])-[C3H]                                                                   | -17.8286 |
| 127 | [C2](=[O2])(-[C3H](-[C3H2])-[N3H2])-[O3]-[C3H2]-[C3H2]-[C3H2]-[C3H2]-[C3H2]-[C3H2]-[C3H2] | -18.6859 |
| 128 | [c](:[cH])(:[cH])-[C2]                                                                    | -20.6146 |
| 129 | [C3H2]-[N3H]-[C3H2]                                                                       | -22.5624 |
| 130 | [N3H2+]                                                                                   | -25.6157 |

Table S6: Regression constant and alerts for the model ILNI\_AI\_class and the related regression coefficients. Regression coefficient indicates contribution towards biodegradation (higher = more biodegradable). Canonical representation of the fragments was chosen to show hybridization, number of hydrogens, formal charge.

| ID | ALERT                                                                  | REGRESSION_COEFFICIENT |
|----|------------------------------------------------------------------------|------------------------|
|    | CONSTANT                                                               | -0.3018                |
| 1  | [C3H2]-[N3+](-[C3H3])(-[C3H3])-[C3H3]                                  | 3.0851                 |
| 2  | [C2]-[C3H2]-[C3H2]                                                     | 1.4679                 |
| 3  | [C2]-[C3H2]-[C3H2]-[C3H2]-[C3H2]                                       | 1.3265                 |
| 4  | [N3H3+]                                                                | 1.3122                 |
| 5  | [C3H3]-[n+](:[cH]):[cH]:[cH]:[cH]                                      | 1.2936                 |
| 6  | [C3](-[F3])(-[F3])(-[F3])-[S3_2]                                       | 0.8861                 |
| 7  | [C2]-[O3H]                                                             | 0.7366                 |
| 8  | [C2]-[C3H3]                                                            | 0.7162                 |
| 9  | [C3H2]-[C3H2]-[O3]-[C3H2]-[C3H2]                                       | 0.7126                 |
| 10 | [C2]-[C3H](-[C3H])-[N3H2]                                              | 0.6696                 |
| 11 | [C2](=[O2])(-[C3H2])-[N3]                                              | 0.6201                 |
| 12 | [C2]-[C3H](-[C3H2])-[N3H3+]                                            | 0.5443                 |
| 13 | [c](:[cH])(:[cH]:[cH]:[cH])-[C2]                                       | 0.4417                 |
| 14 | [C3H2]-[C3H2]-[N3H]-[C3H2]-[C3H2]                                      | 0.2922                 |
| 15 | [C3H](-[C3H2])(-[C3H3])-[C3H3]                                         | 0.2303                 |
| 16 | [C3H2](-[C3H2]-[C3H3])-[C3H2]-[O3]                                     | 0.2293                 |
| 17 | [C2]-[C3H2]-[C3H]                                                      | 0.1792                 |
| 18 | [C3H2]-[C3H2]-[N3H2]                                                   | 0.0949                 |
| 19 | [nH]                                                                   | 0.0687                 |
| 20 | [C2]-[C3H2]-[C3H2]-[C3H2]-[C3H2]-[C3H2]-[C3H2]-[C3H2]-[C3H2]           | 0.0585                 |
| 21 | [C2]-[N3](-[C3H2])-[C3H3]                                              | 0.0430                 |
| 22 | [C2](=[O2])(-[C3H2]-[C3H2])-[N3](-[C3H2]-[C2](=[O2])-[O2-])-[C3H3]     | 0.0326                 |
| 23 | [C2](=[O2])(-[C3H2]-[N3])-[O2-]                                        | 0.0102                 |
| 24 | [C2](=[O2])(-[C3H](-[C3H2])-[N3H3+])-[O3]-[C3H2]                       | 0.0016                 |
| 25 | [C2](=[O2])(-[C3H2]-[C3H2]-[C3H2]-[C3H2]-[C3H2]-[C3H2]-[C3H2])-[N3]    | 0.0009                 |
| 26 | [c]-[C3H2]-[C3H](-[C2](=[O2])-[O3]-[C3H2]-[C3H2]-[C3H2]-[C3H2])-[N3H2] | -0.0002                |
| 27 | [C2]-[C3H](-[C3H2]-[S3H])-[N3H2]                                       | -0.0002                |
| 28 | [C2]-[C2H]=[C2](-[C3H3])-[O3]-[S3_2]                                   | -0.0003                |
| 29 | [N2-]-[S3_2](=[O2])(=[O2])-[O3]                                        | -0.0013                |
| 30 | [c]                                                                    | -0.0110                |
| 31 | [C2](=[C2H])(-[C3H3])-[O3]                                             | -0.0232                |
| 32 | [c](:[cH])(:[cH])-[O3]                                                 | -0.0295                |

|    |                                                                                                |         |
|----|------------------------------------------------------------------------------------------------|---------|
| 33 | [c]:[cH]:[cH]                                                                                  | -0.0323 |
| 34 | [C3H2]-[C3H2]-[N3+]                                                                            | -0.0376 |
| 35 | [C3H2]-[C3H3]-[n]                                                                              | -0.0547 |
| 36 | [C3H2]-[N3+]-[C3H2]-[C3H3]                                                                     | -0.0610 |
| 37 | [c](:[cH]:[cH])(:[cH]:[cH])-[C3H2]-[C3H](-[C2](=[O2])-[O3]-[C3H2]-[C3H2]-[C3H2]-[C3H2])-[N3H2] | -0.0627 |
| 38 | [C2]-[O3]-[C3H2]-[C3H3]                                                                        | -0.0714 |
| 39 | [O3]                                                                                           | -0.0767 |
| 40 | [C3H2]                                                                                         | -0.1017 |
| 41 | [C3H2]-[C3H3]                                                                                  | -0.1561 |
| 42 | [N3H]                                                                                          | -0.1926 |
| 43 | [C3H2]-[C3H2]-[N3H2+]                                                                          | -0.2359 |
| 44 | [C3H3]-[O3]                                                                                    | -0.2799 |
| 45 | [Br3-]                                                                                         | -0.3028 |
| 46 | [c]:[cH]:[cH]:[cH]:[n+]                                                                        | -0.3031 |
| 47 | [C2]-[O3]-[S3_2]                                                                               | -0.3207 |
| 48 | [C3H2]-[C3H2]-[N3]                                                                             | -0.3741 |
| 49 | [c](:[cH])(:[cH])-[C3H]                                                                        | -0.4450 |
| 50 | [C2](=[O2])(-[C3H](-[C3H2])-[N3H])-[O3]-[C3H2]-[C3H3]                                          | -0.5287 |
| 51 | [N3H2+]                                                                                        | -0.6133 |
| 52 | [C3H3]-[n+] <sub>1</sub> : [cH]:[cH]:[n]:[cH] <sub>1</sub>                                     | -0.6323 |
| 53 | [C2]-[N2-]-[S3_2]                                                                              | -0.6451 |
| 54 | [S3H]                                                                                          | -0.6567 |
| 55 | [N3+]                                                                                          | -0.6766 |
| 56 | [n]                                                                                            | -0.8423 |
| 57 | [C3H2](-[C3H2]-[C3H2]-[C3H2]-[C3H2]-[C3H3])-[C3H2]-[C3H2]-[C3H2]-[C3H2]-[O3]                   | -0.9708 |
| 58 | [C2](=[O2])(-[C3H](-[C3H2])-[N3H2])-[O3]-[C3H2]-[C3H2]-[C3H2]-[C3H2]-[C3H2]                    | -1.0219 |
| 59 | [C3H2]-[N3+]-[C3H2]-[C3H2]                                                                     | -1.0421 |
| 60 | [n+]                                                                                           | -1.2691 |

## 2. Model validation

The validation of QSBRs was divided in internal and external validation as proposed by OECD to assess the goodness-of-fit and the predictivity.<sup>6</sup> The goodness-of-fit indicates the model's ability to reproduce the experimental data in the training set.<sup>7</sup> The predictivity is the ability to predict reliably biodegradability for chemicals in the test set.<sup>7</sup> To assess the goodness-of-fit in the internal validation *train\_set\_IL* was used for the models IL\_FP\_cont, IL\_AI\_cont, IL\_AI\_class and *train\_set\_ILNI* for the models ILNI\_AI\_cont and ILNI\_AI\_class. In the external

validation the model's predictivity was evaluated using *test\_set\_IL* for the models IL\_FP\_cont, IL\_AI\_cont, IL\_AI\_class and *test\_set\_ILNI* for the models ILNI\_AI\_cont and ILNI\_AI\_class.

Typical performance measures for classification models are the accuracy (equation 1, Table S7), the sensitivity (true positive rate (TPR), equation 2, Table S7), the specificity (true negative rate (TNR), equation 3, Table S7) and the area under the curve (AUC).<sup>6,8</sup> The accuracy is the proportion of correctly classified chemicals as positive (biodegradable) or negative (non-biodegradable) (equation 1). If a model has a higher value for the accuracy compared to another model, it is more reliable.<sup>6</sup> The sensitivity and specificity measure the correct classification of chemicals as positive and as negative, respectively (equations 2 and 3, Table S7). A high sensitivity corresponds to a high true positive rate indicating a high probability that the test chemical is correctly predicted as positive.<sup>6</sup> A high specificity or true negative rate is related to a high probability that a chemical is correctly predicted as negative.<sup>6</sup> The AUC is defined as the area under the receiver operating characteristic (ROC) curve and can have values from 0.0 to 1.0, while 1.0 indicates that the model's predictions are all correct and 0.5 that the model cannot discriminate between the two classes. The ROC and AUC show the relationship between sensitivity and specificity of a model.<sup>6,8</sup> TPR, TNR, the accuracy and AUC were calculated based on the training set and the test set to assess the goodness-of-fit and the predictivity, respectively, of the models IL\_AI\_class and ILNI\_AI\_class. Several performance measures were evaluated for classification models since accuracy, sensitivity, specificity and AUC help to understand the model's performance in predicting both classes, biodegradable and non-biodegradable ILs.

For OLS models a commonly used performance measure is the squared correlation coefficient  $R^2$ , which ranges from 0.0 to 1.0.<sup>6,8</sup> A  $R^2$  of 1.0 means that the predictions correspond to the experimental values for given a property.  $R^2$  was calculated based on the training set to assess

the goodness-of-fit and on the test set to assess the predictivity for IL\_FP\_cont, IL\_AI\_cont and ILNI\_AI\_cont (equation 4, Table S7).

Table S7: Performance measures and equations.

| No. | Performance measure | equation                                                                                                     | explanations                                                                                                                                 |
|-----|---------------------|--------------------------------------------------------------------------------------------------------------|----------------------------------------------------------------------------------------------------------------------------------------------|
| 1   | Accuracy            | $\text{accuracy} = \frac{TP + TN}{TP + FP + TN + FN} \times 100$                                             | TP, true positives<br>TN, true negatives<br>FP, false positives<br>FN, false negatives<br>TPR, true positive rate<br>TNR, true negative rate |
| 2   | TPR                 | $\text{TPR} = \frac{TP}{TP + FN} \times 100$                                                                 |                                                                                                                                              |
| 3   | TNR                 | $\text{TNR} = \frac{TN}{TN + FP} \times 100$                                                                 |                                                                                                                                              |
| 4   | R <sup>2</sup>      | $R^2 = 1 - \frac{\sum (y_{\text{exp}} - y_{\text{pred}})^2}{\sum (y_{\text{exp}} - \bar{y}_{\text{exp}})^2}$ |                                                                                                                                              |

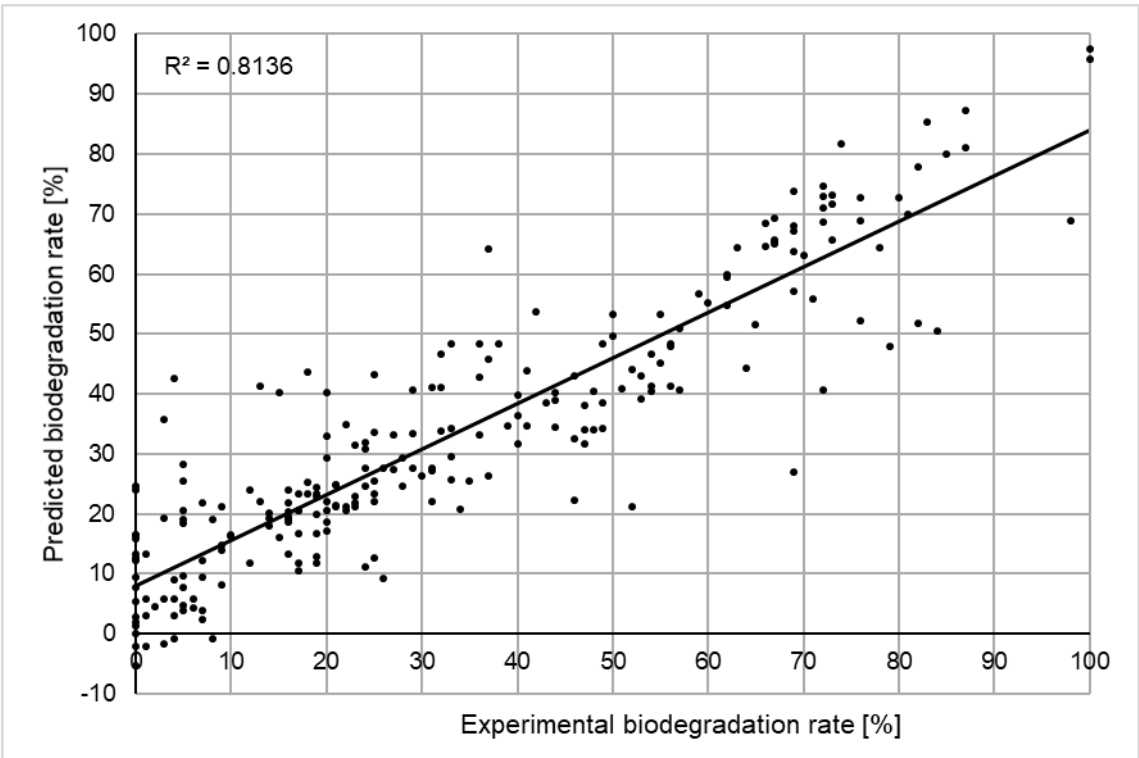

Figure S1: Predicted vs. experimental biodegradation rates for the IL\_train\_set of the model IL\_FP\_cont.



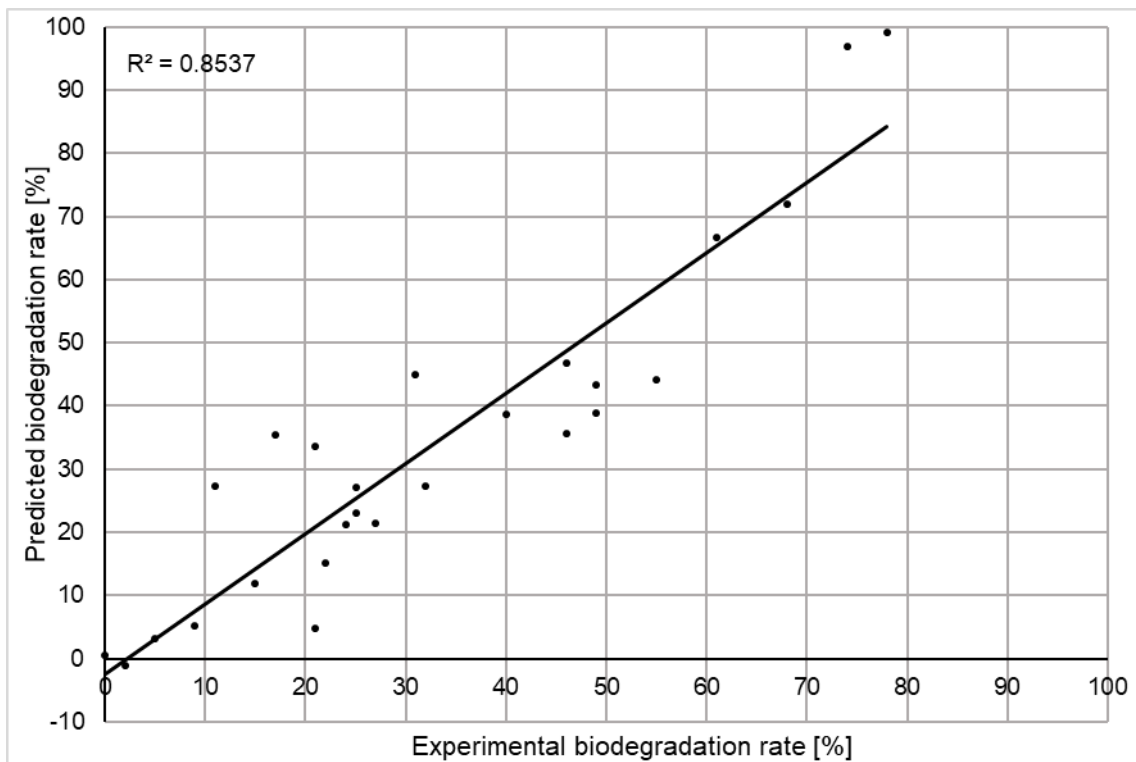

Figure S2: Predicted vs. experimental biodegradation rates for the IL\_test\_set of the model IL\_FP\_cont.

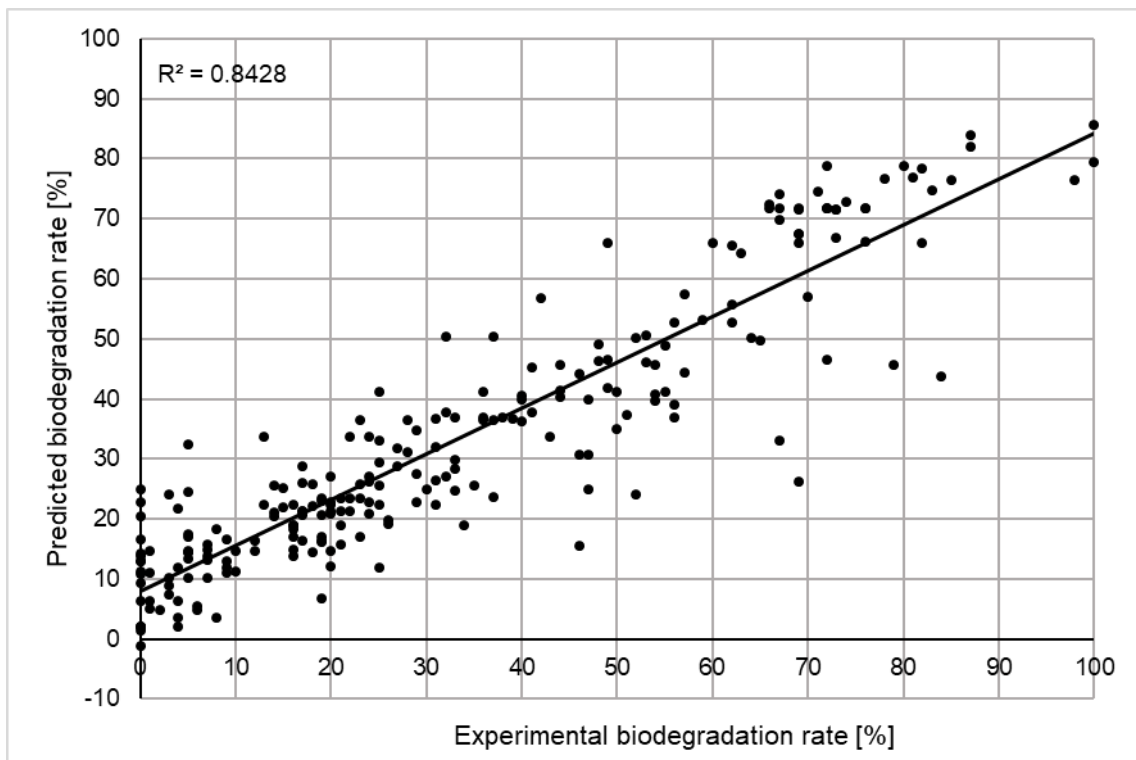

Figure S3: Predicted vs. experimental biodegradation rates for the IL\_train\_set of the model IL\_AI\_cont.

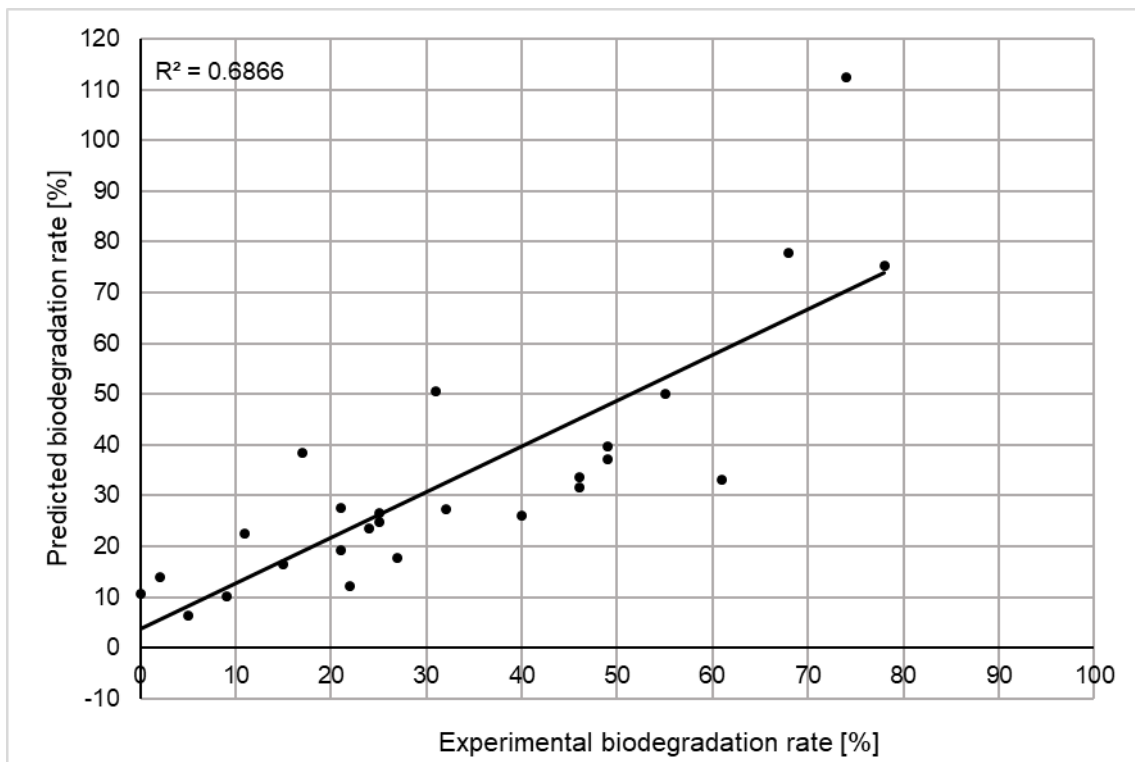

Figure S4: Predicted vs. experimental biodegradation rates for the IL\_test\_set of the model IL\_AI\_cont.

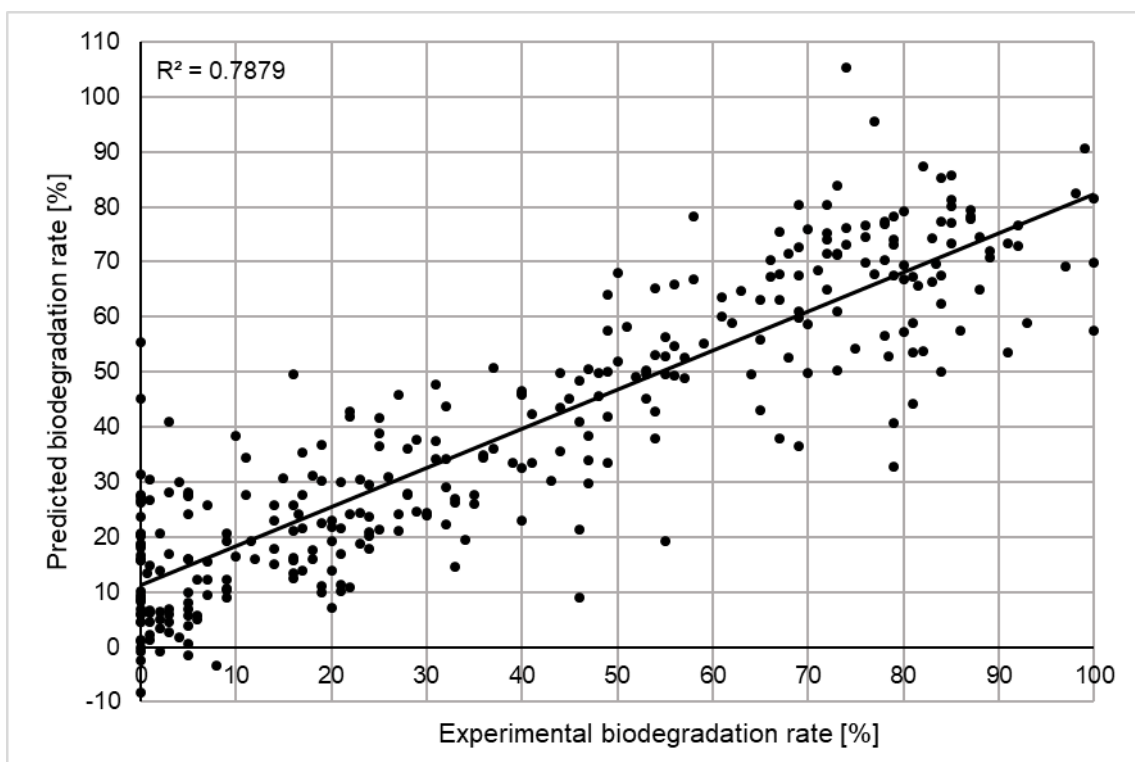

Figure S5: Predicted vs. experimental biodegradation rates for the IL\_train\_set of the model ILNI\_AI\_cont.

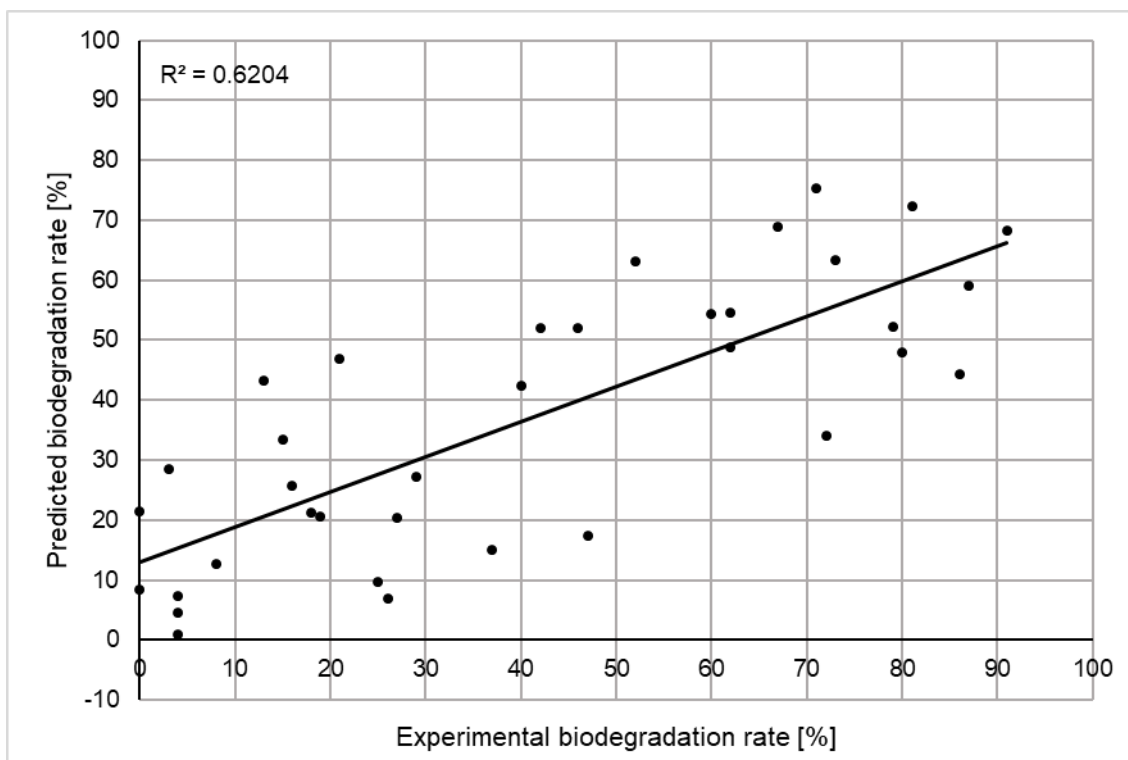

Figure S6: Predicted vs. experimental biodegradation rates for the IL\_test\_set of the model ILNI\_AI\_cont.

Table S8: Compliance of models with OECD principles for validating (Q)SAR models.

| principle                                                               | model 1                           | model 2                           | model 3                           | model 4                           | model 5                           |
|-------------------------------------------------------------------------|-----------------------------------|-----------------------------------|-----------------------------------|-----------------------------------|-----------------------------------|
|                                                                         | IL_FP_cont                        | IL_AI_cont                        | IL_AI_class                       | ILNI_AI_cont                      | ILNI_AI_class                     |
| 1. a defined endpoint                                                   | ✓                                 | ✓                                 | ✓                                 | ✓                                 | ✓                                 |
| 2. an unambiguous algorithm                                             | ✓                                 | ✓                                 | ✓                                 | ✓                                 | ✓                                 |
| 3. a defined domain of applicability                                    | ✓                                 | ✓                                 | ✓                                 | ✓                                 | ✓                                 |
| 4. appropriate measures of goodness-of-fit, robustness and predictivity | goodness-of-fit<br>predictivity ✓ |
| 5. a mechanistic interpretation, if possible                            | ✓                                 | ✓                                 | ✓                                 | ✓                                 | ✓                                 |

### 3. Clustering

Table S9: tSNE coordinates for tSNE plot train\_set\_IL.

| Name         | SMILES                                                                                              | TSNE_1            | TSNE_2            |
|--------------|-----------------------------------------------------------------------------------------------------|-------------------|-------------------|
| Piperi_2_100 | <chem>C1CC[N+]CC1.O=C([O-])CN(C)C(=O)CCCCCCCCC</chem>                                               | 3.70766973495483  | 1.07376456260681  |
| Morph_3_100  | <chem>C1COCC[N+]1.O=C([O-])CN(C)C(=O)CCCCCCCCC</chem>                                               | 3.70271754264831  | 1.09090626239776  |
| QAC_43_98    | <chem>C[N+](C)(C)CC(O)CC(O)=O.[Cl-]</chem>                                                          | -4.43112134933471 | 17.770824432373   |
| Chol_13_87   | <chem>C[N+](C)(C)CCO.O=C([O-])C(N)CCC(N)=O</chem>                                                   | -6.2032356262207  | 12.8914775848388  |
| Chol_12_87   | <chem>C[N+](C)(C)CCO.O=C([O-])C(N)CC(N)=O</chem>                                                    | -6.17524480819702 | 13.2271690368652  |
| Chol_11_85   | <chem>C[N+](C)(C)CCO.OC(=O)CCC(N)C([O-])=O</chem>                                                   | -5.27482938766479 | 13.03931999206540 |
| Pyri_59_84   | <chem>C[n+]1cccc(c1)C(O)=O.[Cl-]</chem>                                                             | 13.7053985595703  | -13.980167388916  |
| Chol_30_83   | <chem>C[N+](C)(C)CCO.[O-]C(=O)CCC(C)C1CC[C@H]2[C@@H]3CC[C@H]4C[C@H](O)CC[C@]4(C)[C@H]3CCC12C</chem> | -18.0120487213134 | 4.72933959960937  |
| Chol_10_82   | <chem>C[N+](C)(C)CCO.OC(=O)CC(N)C([O-])=O</chem>                                                    | -5.31530332565307 | 13.4411344528198  |
| Chol_1_82    | <chem>C[N+](C)(C)CCO.[Cl-]</chem>                                                                   | -5.16975688934326 | 18.4372158050537  |
| QAC_44_81    | <chem>C[N+](C)(C)CCOC(N)=O.[Cl-]</chem>                                                             | -5.0218768119812  | 19.5310478210449  |
| Pyri_63_80   | <chem>CCCCCCC[n+]1cccc(C)c(C)c1.CCCCCCCCCC(=O)N(C)CC([O-])=O</chem>                                 | 0.650794327259063 | -13.0990304946899 |
| Pyrr_1_79    | <chem>CCCC[N+]1(C)CCCC1.C(F)(F)S(=O)(=O)[N-]S(=O)(=O)C(F)(F)F</chem>                                | 11.3414325714111  | 2.7429928779602   |
| Pyri_62_78   | <chem>CCCCC[n+]1cccc1.CCCCCCCCCC(=O)N(C)CC([O-])=O</chem>                                           | 0.917508006095886 | -12.7225151062011 |
| Chol_18_76   | <chem>C[N+](C)(C)CCO.NC(Cc1cnc2cccc12)C([O-])=O</chem>                                              | -3.88214564323425 | 11.4677810668945  |
| Chol_7_76    | <chem>C[N+](C)(C)CCO.OCC(N)C([O-])=O</chem>                                                         | -5.5636134147644  | 15.1276664733886  |
| QAC_42_76    | <chem>C[N+](C)(C)CC([O-])=O</chem>                                                                  | -6.22535133361816 | 18.5007190704345  |
| Chol_8_74    | <chem>C[N+](C)(C)CCO.[O-]C(=O)C(N)C(C)O</chem>                                                      | -5.68957757949829 | 14.5134315490722  |
| Chol_2_73    | <chem>C[N+](C)(C)CCO.O=C([O-])CN</chem>                                                             | -5.39975976943969 | 16.3803367614746  |
| Chol_16_73   | <chem>C[N+](C)(C)CCO.O=C([O-])C(N)CCNC(=N)N</chem>                                                  | -5.99325132369995 | 11.6799812316894  |
| Chol_24_73   | <chem>C[N+](C)(C)CCO.O=C([O-])CC1CCCCC1</chem>                                                      | -3.68059182167053 | 15.1449298858642  |
| Pyrr_3_72    | <chem>CCCC[N+]1(C)CCCC1.CCCCCCCCCC(=O)N(C)CC([O-])=O</chem>                                         | -16.0947036743164 | 4.24710750579833  |
| Chol_5_72    | <chem>C[N+](C)(C)CCO.O=C([O-])C(N)CC(C)C</chem>                                                     | -4.79062891006469 | 14.2884378433227  |
| Chol_3_72    | <chem>C[N+](C)(C)CCO.O=C([O-])C(C)N</chem>                                                          | -5.52838993072509 | 15.6727571487426  |
| Chol_6_72    | <chem>C[N+](C)(C)CCO.O=C([O-])C(N)C(C)CC</chem>                                                     | -4.82197189331054 | 14.2499446868896  |
| Pyri_14_72   | <chem>CCCCCCCCCOC[n+]1cccc(O)c1.[N-]1C(=O)c2cccc2S1(=O)=O</chem>                                    | 3.50151777267456  | -14.6842365264892 |
| Chol_25_71   | <chem>C[N+](C)(C)CCO.[O-]C(=O)c1cccc1</chem>                                                        | -3.2891616821289  | 13.4801225662231  |
| Chol_32_70   | <chem>C[N+](C)(C)CCO.Cl[Zn-](Cl)Cl</chem>                                                           | -5.48714685440063 | 17.3066253662109  |
| Chol_22_69   | <chem>C[N+](C)(C)CCO.[O-]C(=O)CC1CCCC1</chem>                                                       | -3.11094474792480 | 16.3323173522949  |
| Chol_4_69    | <chem>C[N+](C)(C)CCO.O=C([O-])C(N)C(C)C</chem>                                                      | -5.02757263183593 | 14.7509088516235  |

|            |                                                                                              |                   |                   |
|------------|----------------------------------------------------------------------------------------------|-------------------|-------------------|
| Pyri_1_69  | OC(=O)C[n+]1cccc1.[Br-]                                                                      | 12.9292669296264  | -14.5266304016113 |
| Chol_23_69 | C[N+](C)(C)CCO.[O-]C(=O)C1CCCC1                                                              | -3.80225753784179 | 15.2759160995483  |
| Chol_21_69 | C[N+](C)(C)CCO.[O-]C(=O)C1CCCC1                                                              | -3.36309957504272 | 16.3540287017822  |
| Chol_19_69 | C[N+](C)(C)CCO.O=C([O-])C                                                                    | -5.2176284790039  | 17.163646697998   |
| QAC_16_67  | CC[N+](C)C.[O-]C(=O)                                                                         | -8.2155475616455  | 10.7281951904296  |
| Chol_17_67 | C[N+](C)(C)CCO.[O-]C(=O)C1CCCN1                                                              | -7.33045291900634 | 16.216438293457   |
| Chol_15_67 | C[N+](C)(C)CCO.NC(Cc1cncn1)C([O-])=O                                                         | -2.05229449272155 | 14.4289722442626  |
| Chol_31_67 | C[N+](C)(C)CCO.[O-]C(=O)C(N)CS                                                               | -6.25245428085327 | 15.0045413970947  |
| Chol_9_66  | C[N+](C)(C)CCO.[O-]C(=O)C(N)CCSC                                                             | -6.43536710739135 | 14.1228103637695  |
| Chol_20_66 | C[N+](C)(C)CCO.NC(Cc1cccc1)C([O-])=O                                                         | -3.79342484474182 | 12.6000175476074  |
| Imid_75_65 | CCOCC[n+]1cc[n](CC#N)c1.FC(F)(F)S(=O)(=O)[N-]S(=O)(=O)C(F)(F)F                               | 11.8988800048828  | 0.837229132652282 |
| Pyri_31_64 | O=C(C[n+]1cccc1)NC(Cc2cccc2)C(=O)OCCCCOC(=O)C(Cc3cccc3)NC(=O)C[n+4]cccc4.[Br-]               | -2.13777637481689 | -6.32551288604736 |
| Pyri_61_63 | CCCC[n+]1cccc1.CCCCCCCCCC(=O)N(C)CC([O-])=O                                                  | 0.975685715675354 | -12.5536394119262 |
| Imid_76_62 | COCCOCC[n+]1cc[n](CC#N)c1.FC(F)(F)S(=O)(=O)[N-]S(=O)(=O)C(F)(F)F                             | 11.8693513870239  | 0.500636935234069 |
| Imid_84_62 | CCCC[n]1cc[n+](C)c1.CCCCCCCCCC(=O)N(C)CC([O-])=O                                             | 5.74297332763671  | -2.08301901817321 |
| Imid_77_62 | COCCOCCOCC[n+]1cc[n](CC#N)c1.FC(F)(F)S(=O)(=O)[N-]S(=O)(=O)C(F)(F)F                          | 11.8274383544921  | 0.216617226600646 |
| Chol_26_60 | C[N+](C)(C)CCO.O=C([O-])c1cccc1O                                                             | -3.17580676078796 | 13.2621307373046  |
| Pyri_36_59 | O=C(C[n+]1cccc1)NC(Cc2cccc2)C(=O)OCCOCCOCCOC(=O)C(Cc3cccc3)NC(=O)C[n+4]cccc4.[Br-]           | -3.51137590408325 | -6.00865173339843 |
| Imid_85_57 | CC[n]1cc[n+](C)c1.O=C([O-])CN(C)C(=O)CCCCCCCCC                                               | 5.81585311889648  | -2.02884793281555 |
| Imid_3_57  | CCCCCOC(=O)C(Cc1cccc1)NC(=O)C[n+2]cc[n](C)c2.[Br-]                                           | 4.48532533645629  | -5.79037475585937 |
| Pyri_29_56 | CCOC(=O)c1ccc[n+](CC(=O)NC(Cc2cccc2)C(O)=O)c1.[Br-]                                          | 5.67592811584472  | -9.65869426727294 |
| Imid_36_56 | CCCCOC(=O)C[n]1cc[n+](C)c1C.[O-]S(=O)(=O)OCCCCCCC                                            | 7.1101369857788   | -3.05688667297363 |
| QAC_27_56  | C[N+](C)(C)C.[O-]C(=O)[C@H]1C[C@@H](O)CN1                                                    | -8.45467090606689 | 16.9133701324462  |
| QAC_18_55  | C[N+](C)(C)C.[O-]C(=O)[C@@H]1CCCN1                                                           | -7.56101369857788 | 17.4599590301513  |
| Imid_34_55 | CCCCOC(=O)C[n]1cc[n+](C)c1C.[O-]S(=O)(=O)OCCCCCCC                                            | 7.48558759689331  | -3.01871514320373 |
| Imid_35_54 | CCCCOC(=O)C[n]1cc[n+](C)c1.[O-]S(=O)(=O)OCCCCCCC                                             | 7.10984754562377  | -2.61270141601562 |
| Pyri_56_54 | CCCCCOC(=O)C(Cc1cccc1)NC(=O)C(Cc2cccc2)NC(=O)C[n+3]cccc3.[Br-]                               | 0.783579647541046 | -7.07958316802978 |
| Pyri_20_54 | CCOC(=O)C(Cc1cccc1)NC(=O)C[n+2]cccc2.[Br-]                                                   | 5.53487205505371  | -8.89069843292236 |
| Imid_11_53 | C[n]1cc[n+](CC(=O)NC(Cc2cccc2)C(=O)OCCCCCCCCOC(=O)C(Cc3cccc3)NC(=O)C[n+4]cc[n](C)c4)c1.[Br-] | -1.44878304004669 | -4.52647304534912 |
| Pyri_23_53 | CCCCCCCCOC(=O)C(Cc1cccc1)NC(=O)C[n+2]cccc2.[Br-]                                             | 2.97736310958862  | -8.0173110961914  |
| Pyri_33_52 | O=C(C[n+]1cccc1)NC(Cc2cccc2)C(=O)OCCCCCCCCOC(=O)C(Cc3cccc3)NC(=O)C[n+4]cccc4.[Br-]           | -2.53383922576904 | -6.12260437011718 |
| Pyri_52_52 | CC[n+1]cccc1.[Br-]                                                                           | 13.1154251098632  | -13.5773162841796 |
| Imid_2_51  | CCCCOC(=O)C(Cc1cccc1)NC(=O)C[n+2]cc[n](C)c2.[Br-]                                            | 5.08151483535766  | -5.9729299545288  |
| Phos_1_50  | CCCC[P+](C)(CCCC)CCCC.COS(=O)(=O)[O-]                                                        | 3.92416477203369  | 2.62208580970764  |

|            |                                                                                         |                   |                   |
|------------|-----------------------------------------------------------------------------------------|-------------------|-------------------|
| QAC_19_50  | C[N+](C)(C)C.[O-]C(=O)[C@H]1CCCN1                                                       | -7.56016159057617 | 17.4596614837646  |
| Pyri_8_49  | CCCCCCCCCOC[n+]1cccc(O)c1.[N-]1C(=O)C=C(C)OS1(=O)=O                                     | 3.69155597686767  | -14.2212114334106 |
| Chol_28_49 | C[N+](C)(C)CCO.[O-]C(=O)c1c2ccccc2cc2ccccc21                                            | -2.25006556510925 | 11.3612747192382  |
| Imid_26_49 | CCOC(=O)C[n]1cc[n+](C)c1.[O-]S(=O)(=O)OCCCCCCC                                          | 7.53869915008544  | -2.58106994628906 |
| Imid_4_48  | CCCCCCCCCOC(=O)C(Cc1cccc1)NC(=O)C[n+](C)c2.[Br-]                                        | 3.86241245269775  | -5.61261940002441 |
| Pyri_18_48 | CCCCCCCCCOC[n+]1cccc(O)c1.[Cl-]                                                         | 7.98306846618652  | -14.2069120407104 |
| Imid_1_47  | CCOC(=O)C(Cc1cccc1)NC(=O)C[n+](C)c2.[Br-]                                               | 5.75005006790161  | -6.25369119644165 |
| Imid_65_47 | CCCC[n]1cc[n+](C)c1.CC(C)C(N)C([O-])=O                                                  | 14.8855390548706  | -4.56465530395507 |
| Pyri_26_47 | CCOC(=O)C(Cc1cccc1)NC(=O)C[n+](C)2cc[n](C)c2.[Br-]                                      | 5.81974220275878  | -8.58088684082031 |
| Pyri_43_46 | CCOC(=O)C(Cc1ccc(O)cc1)NC(=O)C[n+](C)2ccc(OC)c2.[Br-]                                   | 5.95815086364746  | -8.30684661865234 |
| Imid_51_46 | CC[n]1cc[n+](C)c1.CC1=CC=C(C=C1)S(=O)(=O)[O-]                                           | 14.3968429565429  | -7.02977752685546 |
| Pyri_22_46 | CCCCCOC(=O)C(Cc1cccc1)NC(=O)C[n+](C)2cccc2.[Br-]                                        | 3.63105058670043  | -8.29030323028564 |
| Imid_9_44  | C[n]1cc[n+](CC(=O)NC(Cc2cccc2)C(=O)OCCCCCCCCCOC(=O)C(Cc3cccc3)NC(=O)C[n+](C)c4)c1.[Br-] | -1.48044347763061 | -4.51763200759887 |
| Pyri_17_44 | CCCCCOC[n+](C)1cccc(O)c1.[Cl-]                                                          | 8.6590871810913   | -14.1882972717285 |
| Imid_5_44  | CCCCCCCCCOC(=O)C(Cc1cccc1)NC(=O)C[n+](C)c2.[Br-]                                        | 3.33737015724182  | -5.48866653442382 |
| Pyri_10_43 | CCOC[n+](C)1cccc(O)c1.[N-]1C(=O)c2ccccc2S1(=O)=O                                        | 5.94947290420532  | -15.4586467742919 |
| Chol_27_42 | C[N+](C)(C)CCO.[O-]C(=O)COc1ccc2ccccc2c1                                                | -2.32754230499267 | 11.5318698883056  |
| Pyri_7_41  | CCCCCOC[n+](C)1cccc(O)c1.[N-]1C(=O)C=C(C)OS1(=O)=O                                      | 5.00788593292236  | -14.1980791091918 |
| Pyri_34_41 | O=C(C[n+](C)1cccc1)NC(Cc2cccc2)C(=O)OCCCCCCCCCOC(=O)C(Cc3cccc3)NC(=O)C[n+](C)c4.[Br-]   | -2.68101978302001 | -5.88569068908691 |
| Imid_8_40  | CCOC(=O)C(Cc1cccc1)NC(=O)C[n+](C)2cc[n+](CC(=O)NC(Cc3cccc3)C(=O)OCC)c2.[Br-]            | 0.955089688301086 | -5.82665395736694 |
| Pyri_16_40 | CCOC[n+](C)1cccc(O)c1.[Cl-]                                                             | 10.2421340942382  | -14.124285697937  |
| Imid_78_40 | CCOC(=O)C(Cc1ccc(O)cc1)NC(=O)C[n+](C)c2.[Br-]                                           | 5.84905672073364  | -6.38624048233032 |
| Pyri_6_39  | CCCCCOC[n+](C)1cccc(O)c1.[N-]1C(=O)C=C(C)OS1(=O)=O                                      | 5.41390371322631  | -14.2299604415893 |
| QAC_28_38  | C[N+](C)(C)C.[O-]C(=O)C1C[C@H](O)CN1                                                    | -8.52370262145996 | 17.5453300476074  |
| Pyrr_2_37  | CC[N+](C)CCCC1.SCC(N)C([O-])=O                                                          | -8.10406589508056 | 14.1254301071166  |
| Pyri_28_37 | CCOC(=O)C(Cc1cccc1)NC(=O)C[n+](C)2cccc(c2)C(O)=O.[Br-]                                  | 5.24513435363769  | -9.37524700164794 |
| Imid_54_37 | CCCC[n]1cc[n+](C)c1.CC2=CC=C(S(=O)([O-])=O)C=C2                                         | 13.9493112564086  | -6.47571039199829 |
| Chol_37_36 | CCCCCCCCCOC(=O)C(Cc1cccc1)NC(=O)C[n+](C)(C)CCO.[Br-]                                    | -6.21300792694091 | 2.90924763679504  |
| QAC_26_36  | C[N+](C)(C)C.[O-]C(=O)[C@@H]1C[C@@H](O)CN1                                              | -8.53542518615722 | 16.9212646484375  |
| Pyri_24_36 | CCCCCCCCCOC(=O)C(Cc1cccc1)NC(=O)C[n+](C)2cccc2.[Br-]                                    | 2.46674966812133  | -7.74947595596313 |
| QAC_22_35  | CCC[N+](CCC)(CCC)CCC.[O-]C(=O)[C@@H]1CCCN1                                              | -13.9218921661376 | 9.15426158905029  |
| Imid_29_34 | CCOC(=O)C[n]1cc[n+](C)c1.N#C\N=C=[N-]                                                   | 20.2988662719726  | -3.80323529243469 |
| QAC_29_33  | C[N+](C)(C)C.[O-]C(=O)[C@@H]1C[C@@H](O)CN1                                              | -8.67232704162597 | 17.3657150268554  |
| Pyri_30_33 | CCOC(=O)C(Cc1cccc1)NC(=O)C[n+](C)2ccc(cc2)N(C)C.[Br-]                                   | 4.85878705978393  | -8.75059223175048 |

|             |                                                                                           |                   |                   |
|-------------|-------------------------------------------------------------------------------------------|-------------------|-------------------|
| Imid_33_33  | CCCCCOC(=O)C[n]1cc[n+](C)c1C.[Br-]                                                        | 19.5842876434326  | -2.5360631942749  |
| Imid_66_33  | CCCC[n]1cc[n+](C)c1.[O-]C(=O)CN                                                           | 15.9784984588623  | -5.40444898605346 |
| Pyri_13_32  | CCCCCCCOC[n+]1cccc(O)c1.[N-]1C(=O)c2cccc2S1(=O)=O                                         | 4.6415991783142   | -15.0310678482055 |
| Pyri_27_32  | CCOC(=O)C(Cc1cccc1)NC(=O)C[n+]2cccc(c2)C(=O)OCC.[Br-]                                     | 6.187735080719    | -9.39742755889892 |
| Pyri_9_32   | CCCCCCCCCCCCCCCCCOC[n+]1cccc(O)c1.[N-]1C(=O)C=C(C)OS1(=O)=O                               | 1.6937916278839   | -14.5220041275024 |
| Pyri_12_31  | CCCCCOC[n+]1cccc(O)c1.[N-]1C(=O)c2cccc2S1(=O)=O                                           | 5.0219097137451   | -15.1908893585205 |
| QAC_30_31   | CC[N+](CC)(CC)CC.[O-]C(=O)[C@H]1C[C@H](O)CN1                                              | -11.4784231185913 | 13.0544080734252  |
| Pyri_50_31  | CCCCOC(=O)C(c1cccc1)[n+]2cccc(c2)C(=O)OCC.[Br-]                                           | 7.901930809021    | -10.2107591629028 |
| QAC_20_31   | CC[N+](CC)(CC)CC.[O-]C(=O)[C@@H]1CCCN1                                                    | -10.5960483551025 | 13.3093738555908  |
| Imid_69_30  | CCCC[n]1cc[n+](C)c1.[O-]C(=O)C(N)Cc1cccc1                                                 | 13.4464435577392  | -5.69276809692382 |
| Imid_32_29  | CCCCCOC(=O)C[n]1cc[n+](C)c1.[Br-]                                                         | 19.1398525238037  | -3.37090444564819 |
| Imid_73_29  | CCOCC[n+]1cc[n](CC#N)c1.N#C[N-]C#N                                                        | 16.6803817749023  | -9.47973823547363 |
| Chol_36_29  | CCCCCOC(=O)C(Cc1cccc1)NC(=O)C[N+](C)(C)CCO.[Br-]                                          | -5.86797857284545 | 3.37457299232482  |
| Piperi_1_28 | CC[N+](C)CCCCC1.[O-]C(=O)C(N)CS                                                           | -8.28321838378906 | 13.6789846420288  |
| Chol_42_28  | C[N+](C)(CCO)CC(=O)NC(Cc1cccc1)C(=O)OCCCCCCCCOC(=O)C(Cc2cccc2)NC(=O)C[N+](C)(C)CCO.[Br-]  | -6.2668137550354  | -1.10086703300476 |
| Chol_38_27  | CCCCCCCCCOC(=O)C(Cc1cccc1)NC(=O)C[N+](C)(C)CCO.[Br-]                                      | -6.45601320266723 | 2.52527904510498  |
| Imid_21_27  | CCCCCCCCCOC(=O)C[n]1cc[n+](C)c1.[Br-]                                                     | 18.39888381958    | -2.56711840629577 |
| Imid_19_26  | CCCCOC(=O)C[n]1cc[n+](C)c1.[Br-]                                                          | 19.3928279876708  | -3.72734451293945 |
| Imid_40_26  | CCCCCCCCC[n]1cc[n+](C)c1.[Br-]                                                            | 16.6098480224609  | -3.58249330520629 |
| Pyri_19_25  | CCCCCCCCCCCCCCCCCOC[n+]1cccc(O)c1.[Cl-]                                                   | 2.02470588684082  | -13.635495185852  |
| Imid_13_25  | CCCC[n]1cc[n+](C)c1.CCCCCCOC(=O)(=O)[O-]                                                  | 7.74207830429077  | -1.78488612174987 |
| Imid_30_25  | CCCOC(=O)C[n]1cc[n+](C)c1.FC(F)(F)S(=O)(=O)[N-]S(=O)(=O)C(F)(F)F                          | 11.8352842330932  | 1.503093957901    |
| Pyri_68_25  | CCCCCCCNC(=O)C(Cc1cccc1)NC(=O)C[n+]2ccc(cc2)C=NO.[Br-]                                    | 1.59297549724578  | -9.14685153961181 |
| QAC_33_25   | CC[N+](CC)(CC)CC.[O-]C(=O)[C@H]1CC(O)CN1                                                  | -11.2249193191528 | 12.7484045028686  |
| QAC_23_25   | CCC[N+](CCC)(CCC)CCC.[O-]C(=O)[C@H]1CCCN1                                                 | -13.9218406677246 | 9.15444660186767  |
| Chol_34_24  | CCOC(=O)C(Cc1cccc1)NC(=O)C[N+](C)(C)CCO.[Br-]                                             | -4.6269416809082  | 5.46800279617309  |
| Pyri_4_24   | CCOCC[n+]1cccc(O)c1.[N-]1C(=O)C=C(C)OS1(=O)=O                                             | 6.23346948623657  | -14.6206903457641 |
| Imid_20_24  | CCCCCOC(=O)C[n]1cc[n+](C)c1.[Br-]                                                         | 18.82590675354    | -3.01911234855651 |
| Chol_40_24  | C[N+](C)(CCO)CC(=O)NC(Cc1cccc1)C(=O)OCCCCCCCCCOC(=O)C(Cc2cccc2)NC(=O)C[N+](C)(C)CCO.[Br-] | -6.26619100570678 | -1.12055337429046 |
| Pyri_66_24  | CCCCCCCNC(=O)C(Cc1cccc1)NC(=O)C[n+]2cccc2C=NO.[Br-]                                       | 1.30206203460693  | -8.72602558135986 |
| QAC_6_23    | CCCC[N+](CCCC)(CCCC)CCCC.[O-]C(=O)[C@@H]1[C@H](O)[C@H](O)[C@@H](O)C(O)O1                  | -17.9732437133789 | 6.27849817276     |
| Imid_31_23  | CCCOC(=O)C[n]1cc[n+](C)c1C.[Br-]                                                          | 20.0255737304687  | -2.9039876461029  |
| Imid_74_23  | CCOCC[n+]1cc[n](CC#N)c1.FC(F)(F)C([O-])=O                                                 | 16.6586875915527  | -9.5876932144165  |
| ProL_5_23   | CCOC(=O)C(Cc1cccc1)NC(=O)C[N+](C)CCCC2C(=O)OCC.[Br-]                                      | -6.12547540664672 | 4.93962574005126  |

|            |                                                                                                   |                   |                   |
|------------|---------------------------------------------------------------------------------------------------|-------------------|-------------------|
| QAC_37_22  | CCC[N+](CCC)(CCC)CCC.[O-]C(=O)[C@@H]1C[C@H](O)CN1                                                 | -14.7729158401489 | 9.16037464141845  |
| Pyri_5_22  | CCCCOC[n+]1cccc(O)c1.[N-]1C(=O)C=C(C)OS1(=O)=O                                                    | 5.96579504013061  | -14.4321346282958 |
| ProL_4_22  | CCOC(=O)C(Cc1cccc1)NC(=O)C[N+](C)CCCC2C(=O)OCC.[Br-]                                              | -6.27430915832519 | 5.0576696395874   |
| Imid_25_21 | CCCCOC(=O)C[n]1cc[n+](C)c1.[Br-]                                                                  | 19.6348304748535  | -4.1734185218811  |
| Imid_18_21 | CCOC(=O)C[n]1cc[n+](C)c1.[Br-]                                                                    | 19.8564758300781  | -4.81188011169433 |
| ProL_6_21  | CCOC(=O)C(Cc1cccc1)NC(=O)C[N+](C)CCCC2C(=O)OCC.[Br-]                                              | -6.27458429336547 | 5.06069374084472  |
| Pyri_47_21 | CCCCOC(=O)C(c1cccc1)[n+](C)cccc2.[Br-]                                                            | 9.24876022338867  | -10.7573413848876 |
| Chol_39_20 | CCCCCCCCCCCCOC(=O)C(Cc1cccc1)NC(=O)C[N+](C)(C)CCO.[Br-]                                           | -6.59240293502807 | 2.26763272285461  |
| QAC_32_20  | CC[N+](CC)(CC)CC.[O-]C(=O)[C@H]1C[C@@H](O)CN1                                                     | -11.2249193191528 | 12.7484045028686  |
| QAC_36_20  | CCC[N+](CCC)(CCC)CCC.[O-]C(=O)C1C[C@H](O)CN1                                                      | -14.9042158126831 | 9.65708923339843  |
| Chol_43_20 | CCOC(=O)C(Cc1ccc(O)cc1)NC(=O)C[N+](C)(C)CCO.[Br-]                                                 | -4.38632345199584 | 5.23766088485717  |
| Imid_80_20 | CCOC(=O)C(c1cccc1)[n+](C)cccc2.[Br-]                                                              | 12.6929006576538  | -7.9522738456726  |
| Pyri_15_20 | CCCCCCCCCCCCCCCCOC[n+](C)cccc(O)c1.[N-]1C(=O)C2CCCC2S1(=O)=O                                      | 1.66072750091552  | -14.5969476699829 |
| Pyri_67_20 | CCCCCCCCNC(=O)C(Cc1cccc1)NC(=O)C[n+](C)CCCC(C=NO)c2.[Br-]                                         | 1.55907976627349  | -8.95856475830078 |
| QAC_41_19  | CCCC[N+](CCCC)(CCCC)CCCC.[O-]C(=O)C1C[C@H](O)CN1                                                  | -16.1742362976074 | 7.18169260025024  |
| QAC_24_19  | CCCC[N+](CCCC)(CCCC)CCCC.[O-]C(=O)[C@@H]1CCCN1                                                    | -15.1174163818359 | 7.31055164337158  |
| QAC_5_19   | CCCC[N+](CCCC)(CCCC)CCCC.[O-]C(=O)[C@@H]1[C@@H](O)[C@H](O)[C@@H](O)C(O)O1                         | -17.9735393524169 | 6.27843809127807  |
| Imid_67_19 | CCCC[n]1cc[n+](C)c1.[O-]C(=O)C(N)CS                                                               | 14.819200515747   | -5.0198802947998  |
| QAC_15_19  | CCCC[N+](CCCC)(CCCC)CCCC.[O-]C(=O)C(N)CS                                                          | -15.2551479339599 | 6.3149185180664   |
| Chol_41_19 | C[N+](C)(CCO)CC(=O)NC(Cc1cccc1)C(=O)OCCCCCCCCCCCCOC(=O)C(Cc2ccc(O)cc2)NC(=O)C[N+](C)(C)CCO.[Br-]  | -6.2657399177551  | -1.13530910015106 |
| ProL_2_19  | CCOC(=O)C(Cc1cccc1)NC(=O)C[N+](C)CCCC2C(O)=O.[Br-]                                                | -5.6663537025452  | 5.69187021255493  |
| Imid_63_18 | COC(=O)C[n]1cc[n+](C)c1.[Br-]                                                                     | 19.7156372070312  | -5.20225620269775 |
| QAC_14_18  | CC[N+](CC)(CC)CC.[O-]C(=O)C(N)CS                                                                  | -9.1321821212769  | 13.5283708572387  |
| Pyri_35_18 | O=C(C[n+](C)1cccc1)NC(Cc2cccc2)C(=O)OCCCCCCCCCCCCOC(=O)C(Cc3cccc(O)cc3)NC(=O)C[n+](C)4cccc4.[Br-] | -2.7738959789276  | -5.60225629806518 |
| Imid_72_17 | CCCCC[n]1cc[n+](C)c1.[O-]C(=O)C(N)CS                                                              | 14.3366813659667  | -4.59002780914306 |
| Morph_2_17 | CCOC(=O)C(Cc1cccc1)NC(=O)C[N+](C)CCOCC2.[Br-]                                                     | -4.9516863822937  | 4.82453870773315  |
| QAC_35_17  | CCC[N+](CCC)(CCC)CCC.[O-]C(=O)[C@H]1C[C@@H](O)CN1                                                 | -14.5710945129394 | 9.73230743408203  |
| QAC_25_17  | CCCC[N+](CCCC)(CCCC)CCCC.[O-]C(=O)[C@H]1CCCN1                                                     | -15.1174163818359 | 7.31055164337158  |
| QAC_34_17  | CCC[N+](CCC)(CCC)CCC.[O-]C(=O)[C@@H]1C[C@@H](O)CN1                                                | -15.0354957580566 | 9.32922649383544  |
| QAC_39_17  | CCCC[N+](CCCC)(CCCC)CCCC.[O-]C(=O)[C@H]1C[C@@H](O)CN1                                             | -16.2392883300781 | 7.41394090652465  |
| QAC_46_16  | CCCCCCCCCCCC[N+](C)(C)Cc1cccc1.[Cl-]                                                              | -13.5167140960693 | 4.34703874588012  |
| Imid_27_16 | CCCCOC(=O)C[n]1cc[n+](C)c1.F[B-](F)(F)F                                                           | 21.3700885772705  | -6.50650644302368 |
| QAC_8_16   | CCCC[N+](CCCC)(CCCC)CCCC.[O-]C(=O)[C@@H](O)[C@H](O)C(O)=O                                         | -16.3372535705566 | 5.82237386703491  |
| QAC_7_16   | CCCC[N+](CCCC)(CCCC)CCCC.[O-]C(=O)[C@H](C)O                                                       | -14.7219638824462 | 6.17397880554199  |



|            |                                                                                                                    |                    |                   |
|------------|--------------------------------------------------------------------------------------------------------------------|--------------------|-------------------|
| Imid_28_16 | CCOC(=O)C[n]1cc[n+](C)c1.F[P-](F)(F)(F)F                                                                           | 21.5415592193603   | -10.3002576828002 |
| Pyri_46_16 | CCOC(=O)C(c1cccc1)[n+]2cccc2.[Br-]                                                                                 | 9.88002300262451   | -10.8908939361572 |
| Imid_71_16 | CC[n]1cc[n+](C)c1.SCC(N)C([O-])=O                                                                                  | 15.1960134506225   | -5.69440650939941 |
| Prol_3_15  | CCOC(=O)C1CCC[N+](C)CC(=O)NC(Cc2cccc2)C(O)=O.[Br-]                                                                 | -5.70781278610229  | 5.83898496627807  |
| Imid_6_15  | CCCCCCCCCOC(=O)C(Cc1cccc1)NC(=O)C[n+]2cc[n](C)c2.[Br-]                                                             | 3.00310373306274   | -5.39265632629394 |
| QAC_45_14  | CN(C)C(=O)Oc1cccc(c1)[N+](C)(C)C.COS(=O)(=O)[O-]                                                                   | -0.667103886604309 | 12.6925706863403  |
| QAC_9_14   | CCCC[N+](CCCC)(CCCC)CCCC.[O-]C(=O)[C@@H](O)CC(=O)O                                                                 | -15.8717374801635  | 5.66511440277099  |
| Imid_53_14 | CCCC[n]1cc[n+](C)c1.O=S(OC)([O-])=O                                                                                | 15.8279113769531   | -6.12765312194824 |
| QAC_31_13  | CC[N+](CC)(CC)CC.[O-]C(=O)[C@@H]1C[C@H](O)CN1                                                                      | -11.3693714141845  | 13.1874265670776  |
| Pyri_11_13 | CCCCOC[n+]1cccc(O)c1.[N-]1C(=O)c2cccc2S1(=O)=O                                                                     | 5.57424306869506   | -15.3808050155639 |
| QAC_12_12  | CCCC[N+](CCCC)(CCCC)CCCC.CC(=O)C([O-])=O                                                                           | -14.3286228179931  | 5.6256628036499   |
| QAC_38_12  | CCCC[N+](CCCC)(CCCC)CCCC.[O-]C(=O)[C@@H]1C[C@H](O)CN1                                                              | -15.9990396499633  | 7.69440460205078  |
| QAC_11_10  | CCCC[N+](CCCC)(CCCC)CCCC.[O-]C(=O)CC(O)=O                                                                          | -14.9612131118774  | 5.48898363113403  |
| Pyri_60_10 | CCCC[n+]1ccc(C)cc1.[Cl-]                                                                                           | 12.1130313873291   | -13.4023532867431 |
| Pyri_65_9  | CCCCCCCNC(=O)C(C)NC(=O)C[n+]1ccc(cc1)C=NO.[Br-]                                                                    | 2.22853279113769   | -9.94932651519775 |
| Imid_55_9  | CC[n]1cc[n+](C)c1.O=C([O-])C                                                                                       | 17.4313564300537   | -6.75688934326171 |
| Imid_44_9  | CCCCC[n]1c[n+](C)c(C)c1C.[I-]                                                                                      | 16.4161834716796   | -1.8695763349533  |
| Imid_48_9  | CC[n]1cc[n+](C)c1.COS(=O)(=O)[O-]                                                                                  | 16.277997970581    | -6.96875619888305 |
| QAC_4_8    | CCCC[N+](CCCC)(CCCC)CCCC.[Br-]                                                                                     | -13.2546215057373  | 6.13899564743041  |
| Pyri_45_8  | COC(=O)C(c1cccc1)[n+]2cccc2.[Br-]                                                                                  | 10.0853462219238   | -10.9872941970825 |
| Imid_15_7  | CCCC[n]1cc[n+](C)c1.F[P-](F)(F)(F)F                                                                                | 21.5092048645019   | -10.3088836669921 |
| Pyri_3_7   | CN(C)c1cc[n+](CC(O)=O)cc1.[Br-]                                                                                    | 12.3336420059204   | -15.1538877487182 |
| Imid_38_7  | CCCCC[n]1cc[n+](C)c1.[Br-]                                                                                         | 17.4007606506347   | -4.89733362197875 |
| Pyri_41_7  | O=C(C[n+]1cccc1)NC(Cc2cccc2)C(=O)NCCOCCOCCNC(=O)C(Cc3cccc3)NC(=O)C[n+]4cccc4.[Br-]                                 | -3.61369204521179  | -6.94945240020751 |
| Imid_41_7  | CC[n]1c(C)c(C)[n+](C)c1C(C)C.[I-]                                                                                  | 16.2888088226318   | -1.25412285327911 |
| Imid_43_6  | CC[n]1c[n+](C)c(C)c1C.[I-]                                                                                         | 16.3416099548339   | -1.46455156803131 |
| Imid_57_6  | C[n]1cc[n+](CC=C)c1.FC(F)(F)C(C(F)(F)F)O[Al-]<br>](OC(C(F)(F)F)C(F)(F)F)(OC(C(F)(F)F)C(F)(F)F)OC(C(F)(F)F)C(F)(F)F | -4.46640443801879  | -14.6331701278686 |
| Imid_12_5  | CCCC[n]1cc[n+](C)c1.[Br-]                                                                                          | 17.9534454345703   | -5.63580560684204 |
| Chol_33_5  | C[N+](C)(CCO)CC(=O)NC(Cc1cccc1)C(O)=O.[Br-]                                                                        | -4.31783580780029  | 6.47932863235473  |
| Imid_17_5  | CCCC[n]1cc[n+](C)c1.C(F)(F)S(=O)(=O)[N-]S(=O)(=O)C(F)(F)F                                                          | 11.7825717926025   | 1.67416656017303  |
| Imid_24_5  | CCN(CC)OC(=O)C[n]1cc[n+](C)c1.[Br-]                                                                                | 21.8344421386718   | -3.8577971458435  |
| Imid_23_5  | CCCN(C)OC(=O)C[n]1cc[n+](C)c1.[Br-]                                                                                | 21.5011959075927   | -3.80479884147644 |
| Pyri_51_5  | CC[n+]1ccc(C)cc1.[Br-]                                                                                             | 12.9039916992187   | -13.3069705963134 |
| Pyri_2_5   | COc1ccc[n+](CC(O)=O)c1.[Br-]                                                                                       | 13.1469249725341   | -14.8747549057006 |

|           |                                                                                                                 |                   |                   |
|-----------|-----------------------------------------------------------------------------------------------------------------|-------------------|-------------------|
| Imid_22_5 | CCCCNOC(=O)C[n]1ccc[n+](C)c1.[Br-]                                                                              | 18.4880065917968  | -4.11404275894165 |
| Imid_79_5 | COC(=O)C(c1cccc1)[n+]2cc[n](C)c2.[Br-]                                                                          | 12.7063598632812  | -7.97579908370971 |
| Pyri_64_4 | CCCCCCCNC(=O)C[n+]1ccc(cc1)C=NO.[Br-]                                                                           | 2.6361756324768   | -10.4159469604492 |
| Pyri_25_4 | CCCCCCCCCOC(=O)C(Cc1cccc1)NC(=O)C[n+]2cccc2.[Br-]                                                               | 2.15518069267272  | -7.55117464065551 |
| Imid_39_4 | CC[n]1cc[n+](C)c1.[Br-]                                                                                         | 18.5165653228759  | -6.71830892562866 |
| QAC_3_4   | CCCC[N+](CCCC)(CCCC)CCCC.[OH-]                                                                                  | -13.2554597854614 | 6.13900661468505  |
| Pyri_37_4 | O=C(C[n+]1cccc1)NC(Cc2cccc2)C(=O)NCCCCCNC(=O)C(Cc3cccc3)NC(=O)C[n+]4cccc4.[Br-]                                 | -3.07766270637512 | -7.37985277175903 |
| Imid_16_3 | CCCC[n]1cc[n+](C)c1.N#CN=C=[N-]                                                                                 | 16.742073059082   | -5.8661789894104  |
| QAC_1_3   | C[N+](C)(C)C.[Br-]                                                                                              | -5.9220643043518  | 18.9447154998779  |
| Imid_59_3 | CCCCC[n+]1cc[n](C)c1.FC(F)(F)C(C(F)(F)F)O[Al-](OC(C(F)(F)F)C(F)(F)F)(OC(C(F)(F)F)C(F)(F)F)OC(C(F)(F)F)C(F)(F)F) | -4.6509952545166  | -14.306616783142  |
| Pyri_53_3 | CCCC[n+]1cccc1.[Br-]                                                                                            | 12.3013162612915  | -13.7580137252807 |
| Imid_60_2 | C[n]1cc[n+](CCO)c1.FC(F)(F)C(C(F)(F)F)O[Al-](OC(C(F)(F)F)C(F)(F)F)(OC(C(F)(F)F)C(F)(F)F)OC(C(F)(F)F)C(F)(F)F)   | -4.57549285888671 | -14.6896724700927 |
| Pyri_57_1 | CN(C)C(=O)Oc1ccc[n+](C)c1.[Br-]                                                                                 | 14.1724615097045  | -15.0681076049804 |
| Pyri_48_1 | CCCCNC(=O)C(c1cccc1)[n+]2cccc2.[Br-]                                                                            | 9.3696060180664   | -10.5075769424438 |
| Imid_37_1 | CC[n]1cc[n+](C)c1.[Cl-]                                                                                         | 18.5165653228759  | -6.71830892562866 |
| Pyri_38_1 | O=C(C[n+]1cccc1)NC(Cc2cccc2)C(=O)NCCCCCNC(=O)C(Cc3cccc3)NC(=O)C[n+]4cccc4.[Br-]                                 | -2.8611762523651  | -7.26053094863891 |
| Pyri_54_0 | CCCC[n+]1ccc(C)cc1.[Cl-]                                                                                        | 12.1137971878051  | -13.4016714096069 |
| Imid_61_0 | CC[n]1cc[n+](C)c1.O=S(C(F)(F)F)([O-])=O                                                                         | 15.4600315093994  | -7.84767150878906 |
| Imid_56_0 | C[n]1cc[n+](CC(O)=O)c1.[Br-]                                                                                    | 18.9134082794189  | -7.47907638549804 |
| Imid_45_0 | CC[n]1cc[n+](C)c1.[B-](F)(F)F                                                                                   | 20.912124633789   | -7.08776330947875 |
| QAC_10_0  | CCCC[N+](CCCC)(CCCC)CCCC.[O-]C(=O)CCC(=O)O                                                                      | -15.3554134368896 | 5.36006641387939  |
| Imid_62_0 | CCC[n+]1cc[n](C)c1.[I-]                                                                                         | 18.6227226257324  | -6.21920871734619 |
| Imid_58_0 | CCCC[n+]1cc[n](C)c1C.FC(F)(F)C(C(F)(F)F)O[Al-](OC(C(F)(F)F)C(F)(F)F)(OC(C(F)(F)F)C(F)(F)F)OC(C(F)(F)F)C(F)(F)F) | -4.5466704368591  | -14.3162717819213 |
| QAC_13_0  | CCCC[N+](CCCC)(CCCC)CCCC.OS(=O)(=O)[O-]                                                                         | -14.1138019561767 | 6.3174729347229   |
| Imid_50_0 | CC[n]1cc[n+](C)c1.C(=[N-])=NC#N                                                                                 | 17.245132446289   | -7.07140016555786 |
| Imid_52_0 | CC[n]1cc[n+](C)c1.F[P-](F)(F)F                                                                                  | 21.5003280639648  | -10.3066329956054 |
| Imid_49_0 | CC[n]1cc[n+](C)c1.CCOS(=O)(=O)[O-]                                                                              | 16.0023708343505  | -7.01844644546508 |
| Pyri_58_0 | C[n+]1cccc1C=NO.[Cl-]                                                                                           | 13.9876689910888  | -13.4650001525878 |
| Imid_82_0 | CCCCNC(=O)C(c1cccc1)[n+]2cc[n](C)c2.[Br-]                                                                       | 12.2079467773437  | -7.27972793579101 |
| QAC_2_0   | CC[N+](CC)(CC)CC.[Br-]                                                                                          | -3.8563106060028  | 18.979694366455   |
| Pyri_39_0 | O=C(C[n+]1cccc1)NC(Cc2cccc2)C(=O)NCCCCCNC(=O)C(Cc3cccc3)NC(=O)C[n+]4cccc4.[Br-]                                 | -2.6003561019897  | -7.26533126831054 |
| Imid_46_0 | CC[n]1cc[n+](C)c1.COP(=O)([O-])OC                                                                               | 16.4550170898437  | -7.60517311096191 |
| Morph_1_0 | CCCC[N+]1(C)CCOCC1.FC(F)(F)C(C(F)(F)F)O[Al-](OC(C(F)(F)F)C(F)(F)F)(OC(C(F)(F)F)C(F)(F)F)OC(C(F)(F)F)C(F)(F)F)   | -5.05876398086547 | -14.4798145294189 |

Table S10: tSNE coordinates for tSNE plot train\_set\_ILNI.

| Name         | SMILES                                                  | TSNE_1       | TSNE_2       |
|--------------|---------------------------------------------------------|--------------|--------------|
| Piperi_2_100 | <chem>O=C([O-])CN(C)C(=O)CCCCCCCCC.[NH2+]1CCCCC1</chem> | -4.168165521 | 1.1301099    |
| Morph_3_100  | <chem>O=C([O-])CN(C)C(=O)CCCCCCCCC.C1C[NH2+]CCO1</chem> | -4.202221023 | 1.090324761  |
| NI_11_100    | <chem>OCCN(C)CC(O)=O</chem>                             | 41.51184064  | 15.50894864  |
| Quat_31_99   | <chem>[Cl-].O=C(OCCCC)[C@@H]([NH3+])Cc1cccc1</chem>     | 5.269448687  | 8.324394137  |
| Chol_46_98   | <chem>C[N+](C)(C)CC(CC(=O)O)O.[Cl-]</chem>              | 2.57023505   | 43.41399206  |
| NI_9_97      | <chem>C(C[C@@H](C(=O)O)N)CNC(=N)O</chem>                | 28.1610961   | 14.17622529  |
| NI_37_93     | <chem>c1cc(cnc1)O</chem>                                | 23.3456031   | -0.036890565 |
| Quat_30_92   | <chem>[Cl-].O=C(OCC)[C@@H]([NH3+])Cc1cccc1</chem>       | 6.598904692  | 8.247170359  |
| NI_81_92     | <chem>C(CN)C(=O)O</chem>                                | 31.33391424  | 7.281841396  |
| NI_31_91     | <chem>CCCCNCCCC</chem>                                  | 45.16599879  | 9.621252609  |
| NI_41_91     | <chem>CCCCOCCOCCO</chem>                                | 41.32966204  | 0.134451478  |
| NI_56_91     | <chem>C1=CC=C(C=C1)CC(C(=O)O)N</chem>                   | 8.242929697  | 8.481162712  |
| NI_18_89     | <chem>CCCCOC(=O)[C@@H](N)CC1=CC=CC=C1</chem>            | 5.468820863  | 7.885792754  |
| NI_57_89     | <chem>CC(C(=O)O)N</chem>                                | 31.27602821  | 6.382873337  |
| NI_6_88      | <chem>C1=CC=C2C(=C1)C(=CN2)CC(C(=O)O)N</chem>           | 7.673508579  | 31.13124811  |
| Anion_3_88   | <chem>CCCCCCCCCCCCOS(=O)(=O)[O-].[Na+]</chem>           | -0.4926201   | 1.057384128  |
| Chol_12_87   | <chem>O=C([O-])C(N)CC(N)=O.C[N+](C)(C)CCO</chem>        | 2.02949084   | 37.88910828  |
| Chol_13_87   | <chem>O=C([O-])C(N)CCC(N)=O.C[N+](C)(C)CCO</chem>       | 1.670028741  | 36.63436067  |
| NI_8_87      | <chem>CC(C)C(C(=O)O)N</chem>                            | 29.79527255  | 10.60055196  |
| NI_59_87     | <chem>C(CC(C(=O)O)N)CN=C(N)N</chem>                     | 26.32837341  | 14.2746257   |
| NI_36_86     | <chem>c1ccnc(c1)O</chem>                                | 23.76381236  | 0.171653663  |
| NI_78_86     | <chem>CCC(=O)O</chem>                                   | 32.77259579  | 6.316309051  |
| Chol_11_85   | <chem>OC(=O)CCC(N)C([O-])=O.C[N+](C)(C)CCO</chem>       | 1.24182741   | 36.8501164   |
| Quat_32_85   | <chem>[Cl-].O=C(OCCCC)[C@@H]([NH3+])Cc1cccc1</chem>     | 4.05589574   | 8.045497379  |
| NI_3_85      | <chem>C1CC(NC1)C(=O)O</chem>                            | 33.0946836   | 12.95110173  |
| NI_44_85     | <chem>CC(=CC(=O)C)C</chem>                              | 36.28107237  | 5.759744649  |
| NI_45_85     | <chem>CC(C)CC(=O)C</chem>                               | 35.06578508  | 6.573941457  |
| Pyri_59_84   | <chem>C[n+]1cccc(c1)C(=O)O.[Cl-]</chem>                 | -40.26136366 | 2.017449976  |
| NI_40_84     | <chem>CCCCOCCO</chem>                                   | 40.67938736  | 0.694121437  |
| NI_58_84     | <chem>C(C(C(=O)O)N)C(=O)O</chem>                        | 27.51422859  | 10.99560066  |
| NI_60_84     | <chem>C(C(C(O)=O)N)C(N)=O</chem>                        | 27.03471316  | 11.19352963  |
| NI_70_84     | <chem>CO</chem>                                         | 33.55565768  | 2.940083208  |

|            |                                                                                                                |              |              |
|------------|----------------------------------------------------------------------------------------------------------------|--------------|--------------|
| NI_65_83   | OC1CNC(C1)C(O)=O                                                                                               | 33.09447484  | 12.99665431  |
| Chol_30_83 | C[N+](C)(C)CCO.[O-]<br>]C(=O)CCC(C)C1CC[C@H]2[C@@H]3CC[C@H]4C[C@H](O)CC[C@]4(C)[C@H]3CCC12C                    | -17.57641036 | 18.42680453  |
| NI_52_83   | CC(C)CNCC(C)C                                                                                                  | 43.50832784  | 8.549003297  |
| Chol_1_82  | C[N+](C)(C)CCO.[Cl-]                                                                                           | 1.199156784  | 44.61068176  |
| Chol_10_82 | OC(=O)CC(N)C([O-])=O.C[N+](C)(C)CCO                                                                            | 1.708260704  | 38.2605536   |
| Anion_2_82 | c1ccc(cc1)C(O)[O-].[Na+]                                                                                       | 20.76170584  | 2.59423968   |
| Chol_47_81 | C[N+](C)(C)CCOC(=O)N.[Cl-]                                                                                     | 2.212917268  | 45.14125584  |
| NI_7_81    | C1=CC(=CC=C1CC(C(=O)O)N)O                                                                                      | 8.512903098  | 8.875362125  |
| NI_16_81   | C1CCNCC1                                                                                                       | 44.91841222  | 9.245235378  |
| QUAT_40_81 | [Cl-].[NH+](C)C                                                                                                | 34.13504017  | 3.293833198  |
| QUAT_43_0  | [Cl-].[NH3+]CCCC                                                                                               | 39.59521504  | 8.5964304    |
| Pyri_62_80 | Cc1cc[n+](CCCCCCCC)cc1C.CCCCCCCCCC(=O)N(C)CC([O-])=O                                                           | -18.0238446  | -1.607312931 |
| NI_29_80   | C(CCN)CC(C(=O)O)N                                                                                              | 27.45796344  | 13.81870216  |
| NI_39_80   | c1cc(nc(c1)C(=O)O)C(=O)O                                                                                       | 21.18397861  | 0.652622963  |
| NI_50_80   | CCCCCCCCC(=O)O                                                                                                 | -1.27127177  | -0.031598491 |
| NI_73_80   | c1ccc(c(c1)C(=O)O)O                                                                                            | 20.79354402  | 2.527505082  |
| Pyrr_1_79  | CCCC[N+](CCCC1)C.C(F)(F)S(=O)(=O)[N-]S(=O)(=O)C(F)(F)F                                                         | 19.03504267  | -22.65445787 |
| Quat_33_79 | [Cl-].O=C(OCCCCCCC)[C@@H]([NH3+])Cc1cccc1                                                                      | 2.81446694   | 7.435884507  |
| NI_5_79    | CC(C(C(=O)O)N)O                                                                                                | 29.35792858  | 9.530025075  |
| NI_34_79   | CN(C)CCO                                                                                                       | 40.58101017  | 14.94170989  |
| NI_49_79   | C1=CC(=CN=C1)C(=O)N                                                                                            | 22.74549639  | 0.587898122  |
| NI_69_79   | CCC(C)C(C(=O)O)N                                                                                               | 29.81484118  | 11.18736239  |
| NI_79_79   | CCCCC(=O)O                                                                                                     | 33.86596455  | 8.159313522  |
| NI_55_78   | C(C(=O)O)N                                                                                                     | 31.54588287  | 5.886906335  |
| Pyri_61_78 | CCCCCCCCCCC(=O)N(C)CC([O-])=O.CCCCC[n+](c1cccc1)                                                               | -17.91434971 | -2.129320559 |
| Chol_29_78 | C[N+](C)(C)CCO.[O-]<br>]C(=O)CC[C@H](C)[C@H]1CC[C@H]2[C@@H]3CC[C@H]4C[C@H](O)CC[C@]4(C)[C@H]3C[C@H](O)[C@@]21C | -17.57759708 | 18.42773625  |
| Pyri_74_78 | C[n+](c1cccc1)C(=O)N.[I-]                                                                                      | -40.03256672 | 1.880176846  |
| QUAT_41_78 | [Cl-].CC(C)C[NH3+]                                                                                             | 33.05759021  | 4.884342952  |
| NI_4_77    | C(C(C(=O)O)N)O                                                                                                 | 29.8246119   | 8.746102487  |
| Anion_4_77 | CCCCCCCCCCC(=O)N(C)CC(=O)[O-].[Na+]                                                                            | -2.723434244 | 0.784262199  |
| Chol_7_76  | OCC(N)C([O-])=O.C[N+](C)(C)CCO                                                                                 | 0.890483982  | 40.30011027  |
| Chol_18_76 | C[N+](C)(C)CCO.[O-]C(=O)C(N)Cc1c[NH]c2cccc21                                                                   | 7.47770161   | 31.53696821  |
| Chol_45_76 | C[N+](C)(C)CC(=O)[O-]                                                                                          | 2.740276481  | 41.0829872   |

|            |                                                       |              |              |
|------------|-------------------------------------------------------|--------------|--------------|
| NI_51_75   | CCCCCN                                                | 39.59979337  | 8.623558841  |
| Chol_8_74  | OCC[N+](C)(C)C.[O-]C(=O)C(N)C(C)O                     | 0.752744482  | 39.50911312  |
| Chol_19_74 | O=C([O-])C.C[N+](C)(C)CCO                             | 1.434515593  | 43.61608054  |
| Chol_44_74 | O=C([O-])CN(C)C(=O)CCCCCCCCC.C[N+](C)(C)CCO           | -5.888977819 | 2.194721849  |
| Chol_2_73  | O=C([O-])CN.C[N+](C)(C)CCO                            | 1.29433192   | 42.7364383   |
| Chol_16_73 | O=C([O-])C(N)CCNC(=N)N.C[N+](C)(C)CCO                 | 1.713930548  | 35.00732014  |
| Chol_24_73 | O=C([O-])CC1CCCCC1.C[N+](C)(C)CCO                     | -4.35956756  | 34.96007924  |
| NI_47_73   | C=CCO                                                 | 32.9630534   | 2.686957114  |
| NI_48_73   | CCOCCOCCOC(=O)C                                       | 41.68063077  | -0.17069442  |
| NI_62_73   | C(CC(=O)O)C(C(=O)O)N                                  | 27.71636955  | 12.38512992  |
| Pyrr_4_72  | CCCC[N+](C)CCCC1.CCCCCCCCCC(=O)N(C)CC([O-])=O         | -6.10492531  | 2.362577076  |
| Pyri_14_72 | [n+](cc(O)ccc1)COCCCCCCCCC.[N-]1C(=O)c2ccccc2S1(=O)=O | -22.56817478 | 1.439575527  |
| Chol_3_72  | O=C([O-])C(N)C.C[N+](C)(C)CCO                         | 1.199310826  | 41.84391399  |
| Chol_5_72  | O=C([O-])C(N)CC(C)C.C[N+](C)(C)CCO                    | 0.074806166  | 38.07138724  |
| Chol_6_72  | O=C([O-])C(N)C(C)CC.C[N+](C)(C)CCO                    | -0.322792228 | 38.57175734  |
| NI_17_72   | C1COCCN1                                              | 43.10957476  | 4.856427009  |
| Chol_25_71 | [O-]C(=O)c1ccccc1.C[N+](C)(C)CCO                      | 6.567566919  | 37.40049527  |
| NI_42_71   | CC(=O)CC(=O)C                                         | 35.69919398  | 6.448567042  |
| Chol_32_70 | Cl[Zn-](Cl)Cl.C[N+](C)(C)CCO                          | 0.585290898  | 44.35613748  |
| NI_61_70   | C(CC(=O)N)C(C(=O)O)N                                  | 27.23998652  | 12.44185321  |
| Pyri_77_70 | [Cl-].Oc1c(C=O)c(c[nH+])c1C)CO                        | 23.10803907  | -1.396034225 |
| Pyri_1_69  | [Br-].OC(=O)C[n+](C)CCCC1                             | -38.22417345 | 0.876527488  |
| Chol_4_69  | O=C([O-])C(N)C(C)C.C[N+](C)(C)CCO                     | -0.183781245 | 39.33730317  |
| Chol_21_69 | OCC[N+](C)(C)C.[O-]C(=O)C1CCCC1                       | -3.773203509 | 36.69320823  |
| Chol_22_69 | [O-]C(=O)CC1CCCC1.C[N+](C)(C)CCO                      | -3.78178668  | 36.58471684  |
| Chol_23_69 | [O-]C(=O)C1CCCC1.C[N+](C)(C)CCO                       | -4.40051879  | 34.91625484  |
| NI_54_69   | CCCC(=O)O                                             | 33.71704278  | 7.676122083  |
| Pyri_70_68 | C[N+](C)1=CC=CC=C1.F[P-](F)(F)(F)F                    | -0.042069124 | -45.53569255 |
| Chol_14_68 | O=C([O-])C(N)CCCCN.C[N+](C)(C)CCO                     | 0.711643751  | 35.64410495  |
| Chol_15_67 | NC(Cc1cnc[NH]1)C([O-])=O.C[N+](C)(C)CCO               | 3.32977713   | 38.41834279  |
| Chol_17_67 | OCC[N+](C)(C)C.[O-]C(=O)C1CCCC1                       | -1.460442534 | 39.6679231   |
| Chol_31_67 | OCC[N+](C)(C)C.[O-]C(=O)C(N)CS                        | 0.356701199  | 41.04710224  |
| Quat_15_67 | CC[NH2+].CC.[O-]C(C)=O                                | 42.85762445  | 6.785198309  |
| Quat_36_67 | [Cl-].O=C(OCCCCCCCCCCCC)[C@@H]([NH3+])Cc1ccccc1       | -0.66241852  | 6.730428619  |

|            |                                                                                                                             |              |              |
|------------|-----------------------------------------------------------------------------------------------------------------------------|--------------|--------------|
| Chol_9_66  | [O-]C(=O)C(N)CCSC.C[N+](C)(C)CCO                                                                                            | -0.36649246  | 36.81434236  |
| Chol_20_66 | NC(Cc1cccc1)C([O-])=O.C[N+](C)(C)CCO                                                                                        | 5.397162473  | 37.13818203  |
| Imid_75_65 | N#CCn1cc[n+](CCOCC)c1.FC(F)(F)S(=O)(=O)[N-]S(=O)(=O)C(F)(F)F                                                                | 19.00377571  | -24.97323987 |
| Quat_35_65 | [Cl-].O=C(OCCCCCCCCC)[C@@H]([NH3+])Cc1cccc1                                                                                 | 0.430862762  | 6.629280083  |
| NI_38_65   | c1c[nH]ccc1=O                                                                                                               | 24.72186898  | 0.098037162  |
| Pyri_31_64 | O=C(N[C@@H](CC1=CC=CC=C1)C(OCCCOCC([C@H](CC2=CC=CC=C2)NC(C[N+]<br>3=CC=CC=C3)=O)=O)C[N+]<br>4=CC=CC=C4.[Br-].[Br-])         | -43.58305223 | -19.7519055  |
| Pyri_60_63 | CCCCCCCCC(=O)N(C)CC([O-])=O.CCCC[n+]<br>1cccc1                                                                              | -17.77728035 | -2.404233095 |
| Imid_76_62 | N#CCn1cc[n+](CCOCCOC)c1.FC(F)(F)S(=O)(=O)[N-]S(=O)(=O)C(F)(F)F                                                              | 19.08691281  | -25.48869526 |
| Imid_77_62 | N#CCn1cc[n+](CCOCCOCCOC)c1.FC(F)(F)S(=O)(=O)[N-]S(=O)(=O)C(F)(F)F                                                           | 19.1944681   | -25.98047827 |
| Imid_84_62 | CCCCn1cc[n+](C)c1.CCCCCCCCCC(=O)N(C)CC([O-])=O                                                                              | -6.82605472  | -5.209869836 |
| Quat_16_61 | CC[NH+](CC)CC.[O-]C(C)=O                                                                                                    | 40.32923626  | 13.89412561  |
| Quat_38_61 | [O-]C=O.[NH3+]CCO                                                                                                           | 31.3219585   | 4.256073238  |
| Chol_26_60 | O=C([O-])c1cccc1O.C[N+](C)(C)CCO                                                                                            | 6.747981418  | 37.41073098  |
| Pyri_36_59 | O=C(N[C@@H](CC1=CC=CC=C1)C(OCCOCCOCCOC([C@H](CC2=CC=CC=C2)NC<br>(C[N+]<br>3=CC=CC=C3)=O)=O)C[N+]<br>4=CC=CC=C4.[Br-].[Br-]) | -44.74463111 | -19.43532084 |
| NI_64_58   | CC(C)CC(C(=O)O)N                                                                                                            | 29.39647522  | 11.72904005  |
| NI_68_58   | C(C(C(=O)O)N)S                                                                                                              | 29.62093242  | 8.128757988  |
| Imid_3_57  | O=C([C@H](CC1=CC=CC=C1)NC(C[N+]<br>2=CN(C=C2)C)=O)OCCCCC.[Br-]                                                              | -17.38958783 | -10.44414844 |
| Imid_85_57 | O=C([O-])CN(C)C(=O)CCCCCCCCC.C[n+]<br>1ccn(CC)c1                                                                            | -6.80887768  | -5.223367701 |
| Imid_36_56 | [O-]S(=O)(=O)OCCCCCCC.O=C(OCCCC)Cn1cc[n+](C)c1C                                                                             | -4.735984029 | -8.809469218 |
| Pyri_29_56 | CCOC(C1=CC=C[N+](CC(N[C@@H](CC2=CC=CC=C2)C(O)=O)=O)=C1)=O.[Br-]                                                             | -23.19388295 | -16.15665378 |
| NI_63_56   | C1=C(NC=N1)CC(C(=O)O)N                                                                                                      | 25.78627052  | 10.78510798  |
| Imid_34_55 | [O-]S(=O)(=O)OCCCCCCC.O=C(OCCC)Cn1cc[n+](C)c1C                                                                              | -5.259866633 | -9.318693449 |
| Pyri_32_55 | O=C(N[C@@H](CC1=CC=CC=C1)C(OCCCCCOCC([C@H](CC2=CC=CC=C2)NC(C[<br>N+]<br>3=CC=CC=C3)=O)=O)C[N+]<br>4=CC=CC=C4.[Br-].[Br-])   | -43.6644138  | -20.30375969 |
| NI_19_55   | CCCCCOCC(=O)[C@@H](N)CC1=CC=CC=C1                                                                                           | 4.295309964  | 7.497153182  |
| NI_24_55   | CCCCCCCCCCCCCOCC(=O)[C@@H](N)CC1=CC=CC=C1                                                                                   | -1.367135191 | 5.927152546  |
| Imid_35_54 | [O-]S(=O)(=O)OCCCCCCC.O=C(OCCCC)Cn1cc[n+](C)c1                                                                              | -4.476823692 | -9.448249994 |
| Pyri_20_54 | O=C(N[C@H](C(OCC)=O)CC1=CC=CC=C1)C[N+]<br>2=CC=CC=C2.[Br-]                                                                  | -22.65289676 | -14.62405173 |
| Pyri_56_54 | O=C(N[C@@H](CC1=CC=CC=C1)C(N[C@@H](CC2=CC=CC=C2)C(OCCCCC)=O)<br>=O)C[N+]<br>3=CC=CC=C3.[Br-]                                | -27.67328889 | -12.80167985 |
| NI_30_54   | CSCCC(C(=O)O)N                                                                                                              | 29.47376096  | 12.89084705  |
| Imid_11_53 | CN1C=C[N+](CC(N[C@H](C(OCCCCCOCC([C@@H](NC(C[N+]<br>2=CN(C)C=C2)=<br>O)CC3=CC=CC=C3)=O)=O)CC4=CC=CC=C4)=O)=O)C1.[Br-].[Br-] | -38.73454629 | -20.46722372 |
| Pyri_23_53 | O=C(N[C@@H](CC1=CC=CC=C1)C(OCCCCCCC)=O)C[N+]<br>2=CC=CC=C2.[Br-]                                                            | -23.53541428 | -11.42386176 |
| Quat_17_53 | [O-]C(=O)[C@@H]1CCCN1.C[N+](C)(C)C                                                                                          | 6.833841692  | 44.29781825  |
| Pyri_33_52 | O=C(N[C@H](C(OCCCCCOCC([C@H](CC1=CC=CC=C1)NC(C[N+]<br>2=CC=CC=C2)<br>)=O)=O)CC3=CC=CC=C3)C[N+]<br>4=CC=CC=C4.[Br-].[Br-])   | -43.30620164 | -20.8751982  |
| Quat_37_52 | [Cl-].O=C(OCCCCCCCCCCCCC)[C@@H]([NH3+])Cc1cccc1                                                                             | -1.473229125 | 6.52364833   |

|            |                                                                                                                                            |              |              |
|------------|--------------------------------------------------------------------------------------------------------------------------------------------|--------------|--------------|
| Imid_2_51  | O=C([C@H](CC1=CC=CC=C1)NC(C[N+]=CN(C=C2)C)=O)OCCCC.[Br-]                                                                                   | -16.77989738 | -11.09013709 |
| Phos_1_50  | CCCC[P+](C)(CCCC)CCCC.COS(=O)(=O)[O-]                                                                                                      | 0.487945641  | 1.041298075  |
| Quat_34_50 | [Cl-].O=C(OCCCCCCCC)[C@@H]([NH3+])Cc1cccc1                                                                                                 | 1.614662027  | 6.904820193  |
| Imid_26_49 | [O-]S(=O)(=O)OCCCCCCC.O=C(OCCC)Cn1cc[n+](C)c1                                                                                              | -4.842853649 | -9.879236898 |
| Pyri_8_49  | [n+] <sub>1</sub> (cc(O)ccc1)COCCCCCCCC.[N-] <sub>1</sub> C(=O)C=C(C)OS1(=O)=O                                                             | -24.95202156 | -0.999018586 |
| Pyri_21_49 | CCCCOC([C@H](NC(C[N+] <sub>1</sub> =CC=CC=C1)=O)CC2=CC=CC=C2)=O.[Br-]                                                                      | -22.99509002 | -13.62750997 |
| Pyri_42_49 | CCOC([C@H](CC1=CC=C(O)C=C1)NC(C[N+] <sub>2</sub> =CC=CC=C2)=O)=O.[Br-]                                                                     | -21.61486099 | -15.42439896 |
| Chol_28_49 | C[N+](C)(C)CCO.[O-]C(=O)c1c2cccc2cc2cccc21                                                                                                 | 6.703150317  | 33.36526009  |
| Imid_4_48  | CN1C=C[N+](CC(N[C@@H](CC2=CC=CC=C2)C(OCCCCCCC)=O)=O)=C1.[Br-]                                                                              | -18.03928385 | -9.859189084 |
| Pyri_18_48 | [n+] <sub>1</sub> (cc(O)ccc1)COCCCCCCCC.[Cl-]                                                                                              | -30.12231549 | -0.155290331 |
| Imid_1_47  | [Br-].O=C(C[n+] <sub>1</sub> ccn(C)c1)N[C@@H](Cc1cccc1)C(=O)OCC                                                                            | -16.25170812 | -11.73193942 |
| Imid_65_47 | CCCCn1cc[n+](C)c1.CC(C)C(N)C([O-])=O                                                                                                       | -1.384168007 | -30.55317564 |
| Pyri_26_47 | COC1=C[N+](CC(N[C@@H](CC2=CC=CC=C2)C(OCC)=O)=O)=CC=C1.[Br-]                                                                                | -21.75436565 | -14.38169874 |
| Pyri_69_47 | CCOC(=O)C[N+] <sub>1</sub> =CC=CC=C1.[Br-]                                                                                                 | -36.9408144  | 1.791706699  |
| NI_53_47   | CC(CN)O                                                                                                                                    | 32.58149099  | 4.604822398  |
| Imid_51_46 | CCN1C=C[N+](=C1)C.CC1=CC=C(C=C1)S(=O)(=O)[O-]                                                                                              | -4.04837953  | -35.39814837 |
| Imid_70_46 | CCCCn1cc[n+](C)c1.[O-]C(=O)C(N)CC(=O)O                                                                                                     | -2.20602047  | -30.62752878 |
| Pyri_22_46 | O=C([C@H](CC1=CC=CC=C1)NC(C[N+] <sub>2</sub> =CC=CC=C2)=O)OCCCCC.[Br-]                                                                     | -23.3191981  | -12.35175544 |
| Pyri_43_46 | CCOC([C@H](CC1=CC=C(O)C=C1)NC(C[N+] <sub>2</sub> =CC(OC)=CC=C2)=O)=O.[Br-]                                                                 | -21.04493861 | -15.02975578 |
| Pyri_55_46 | O=C(N[C@@H](CC1=CC=CC=C1)C(N[C@@H](CC2=CC=CC=C2)C(OCCCC)=O)O)C[N+] <sub>3</sub> =CC=CC=C3.[Br-]                                            | -27.69501948 | -12.85429455 |
| NI_14_45   | OCCN(C)CC(N[C@@H](CC1=CC=CC=C1)C(OCC)=O)=O                                                                                                 | 3.480790876  | 13.37404125  |
| Imid_5_44  | CN1C=C[N+](CC(N[C@@H](CC2=CC=CC=C2)C(OCCCCCCCC)=O)=O)=C1.[Br-]                                                                             | -18.60819771 | -9.415035003 |
| Imid_9_44  | O=C(N[C@@H](CC1=CC=CC=C1)C(OCCCCCCCCCO([C@H](CC2=CC=CC=C2)NC(C[N+] <sub>3</sub> =CN(C)C=C3)=O)=O)C[N+] <sub>4</sub> =CN(C)C=C4.[Br-].[Br-] | -39.03674402 | -20.34936884 |
| Pyri_17_44 | [n+] <sub>1</sub> (cc(O)ccc1)COCCCCC.[Cl-]                                                                                                 | -30.75216881 | 0.027377054  |
| Pyri_10_43 | [n+] <sub>1</sub> (cc(O)ccc1)COCCC.[N-] <sub>1</sub> C(=O)c2cccc2S1(=O)=O                                                                  | -24.28708633 | 2.954290266  |
| Chol_27_42 | C[N+](C)(C)CCO.[O-]C(=O)COc1ccc2cccc2c1                                                                                                    | 6.931767822  | 33.02598095  |
| Pyri_7_41  | [n+] <sub>1</sub> (cc(O)ccc1)COCCCCC.[N-] <sub>1</sub> C(=O)C=C(C)OS1(=O)=O                                                                | -25.88017927 | -0.931274499 |
| Pyri_34_41 | O=C(N[C@@H](CC1=CC=CC=C1)C(OCCCCCCCCCO([C@H](CC2=CC=CC=C2)NC(C[N+] <sub>3</sub> =CC=CC=C3)=O)=O)C[N+] <sub>4</sub> =CC=CC=C4.[Br-].[Br-]   | -42.70510734 | -21.00352546 |
| Imid_8_40  | CCOC([C@H](CC1=CC=CC=C1)NC(CN2C=C[N+](CC(N[C@@H](CC3=CC=CC=C3)C(OCC)=O)=O)=O)=O).[Br-]                                                     | -28.68863346 | -13.5999403  |
| Imid_10_40 | O=C(N[C@@H](CC1=CC=CC=C1)C(OCCCCCCCCCO([C@H](CC2=CC=CC=C2)NC(C[N+] <sub>3</sub> =CN(C)C=C3)=O)=O)C[N+] <sub>4</sub> =CN(C)C=C4.[Br-].[Br-] | -39.23469619 | -20.2459143  |
| Imid_78_40 | CCOC([C@H](CC1=CC=C(O)C=C1)NC(C[N+] <sub>2</sub> =CN(C)C=C2)=O)=O.[Br-]                                                                    | -16.4252457  | -12.1592158  |
| Pyri_16_40 | [n+] <sub>1</sub> (cc(O)ccc1)COCCC.[Cl-]                                                                                                   | -31.62386281 | 0.295497523  |
| Quat_21_40 | [O-]C(=O)[C@@H] <sub>1</sub> C[C@@H](O)CN1.C[N+](C)(C)C                                                                                    | 6.836001743  | 44.28854017  |
| NI_43_40   | CC(CCO)OC                                                                                                                                  | 39.57576649  | 1.588378871  |

|             |                                                                                                          |              |              |
|-------------|----------------------------------------------------------------------------------------------------------|--------------|--------------|
| Pyri_6_39   | [n+] <sub>1</sub> (cc(O)ccc1)COCCCCC.[N-]1C(=O)C=C(C)OS1(=O)=O                                           | -26.26669914 | -0.687223315 |
| Imid_54_37  | C[N+] <sub>1</sub> =CN(CCCC)C=C1.CC2=CC=C(S(=O)([O-])=O)C=C2                                             | -4.095410008 | -35.32126446 |
| Pyrr_2_37   | SCC(N)C([O-])=O.C[N+] <sub>1</sub> (CC)CCCC1                                                             | -1.863569173 | 41.91264498  |
| Pyri_28_37  | OC(C1=CC=C[N+](CC(N[C@@H](CC2=CC=CC=C2)C(OCC)=O)=O)=C1)=O.[Br-]                                          | -22.81041669 | -15.51797437 |
| Pyri_24_36  | O=C(N[C@@H](CC1=CC=CC=C1)C(OCCCCCCCC)=O)C[N+] <sub>2</sub> =CC=CC=C2.[Br-]                               | -23.43356326 | -10.65127558 |
| Chol_37_36  | OCC[N+](C)(C)CC(N[C@@H](CC1=CC=CC=C1)C(OCCCCCCCC)=O)=O.[Br-]                                             | -7.976210191 | 13.90056549  |
| Pyri_52_35  | CC[N+] <sub>1</sub> =CC=CC=C1.[Br-]                                                                      | -39.12213142 | 3.1033291    |
| NI_10_35    | O=C(N[C@H](C(OCC)=O)CC1=CC=CC=C1)CN2C=NC=C2                                                              | 4.072615644  | 12.76585949  |
| Imid_29_34  | N#C\N=C=[N-].O=C(OCCC)Cn1cc[n+](C)c1                                                                     | 9.38175245   | -25.92303897 |
| Imid_33_33  | [Br-].O=C(OCCCC)Cn1cc[n+](C)c1C                                                                          | 6.826574592  | -25.4769798  |
| Imid_66_33  | CCCCn1cc[n+](C)c1.[O-]C(=O)CN                                                                            | 0.373180727  | -32.19765325 |
| Pyri_30_33  | CN(C)C1=CC=[N+](CC(N[C@@H](CC2=CC=CC=C2)C(OCC)=O)=O)C=C1.[Br-]                                           | -23.74233692 | -14.81449945 |
| Imid_64_32  | CCCCn1cc[n+](C)c1.[O-]C(=O)C1CCCN1                                                                       | -0.95912671  | -29.79150857 |
| Pyri_9_32   | [n+] <sub>1</sub> (cc(O)ccc1)COCCCCCCCCCCCCC.[N-]1C(=O)C=C(C)OS1(=O)=O                                   | -20.17415067 | -0.09681773  |
| Pyri_13_32  | [n+] <sub>1</sub> (cc(O)ccc1)COCCCCC.[N-]1C(=O)c2cccc2S1(=O)=O                                           | -23.29665397 | 2.12478414   |
| Pyri_27_32  | CCOC(C1=C[N+](CC(N[C@H](C(OCC)=O)CC2=CC=CC=C2)=O)=CC=C1)=O.[Br-]                                         | -22.56753043 | -16.73452815 |
| Pyri_12_31  | [n+] <sub>1</sub> (cc(O)ccc1)COCCCCC.[N-]1C(=O)c2cccc2S1(=O)=O                                           | -23.68902102 | 2.30685113   |
| Pyri_44_31  | CCOC([C@H](CC1=CC=C(O)C=C1)NC(C[N+] <sub>2</sub> =CC=CC(C(OCC)=O)=C2)=O)=O.[Br-]                         | -21.93045312 | -16.9579751  |
| Pyri_50_31  | CCOC(C1=CC=C[N+](C(C(OCCCC)=O)C2=CC=CC=C2)=C1)=O.[Br-]                                                   | -16.77039386 | -22.00275238 |
| Imid_69_30  | CCCCn1cc[n+](C)c1.[O-]C(=O)C(N)Cc1cccc1                                                                  | -3.611413409 | -30.68789222 |
| Quat_19_30  | [O-]C(=O)[C@@H]1CCCN1.CCC[N+](CCC)(CCC)CCC                                                               | -22.05205164 | 29.81904446  |
| Imid_32_29  | [Br-].O=C(OCCCC)Cn1cc[n+](C)c1                                                                           | 6.763455456  | -26.67303912 |
| Imid_73_29  | N#CCn1cc[n+](CCOCC)c1.N#C[N-]C#N                                                                         | 13.4841017   | -27.18036423 |
| Chol_36_29  | O=C([C@H](CC1=CC=CC=C1)NC(C[N+](C)(CCO)C)=O)OCCCCC.[Br-]                                                 | -7.651334015 | 14.82744608  |
| Piperi_1_28 | C[N+] <sub>1</sub> (CC)CCCC1.[O-]C(=O)C(N)CS                                                             | -3.227221466 | 42.1706276   |
| Chol_42_28  | OCC[N+](C)(C)CC(N[C@H](C(OCCCCCOC([C@H](CC1=CC=CC=C1)NC(C[N+](C)(C)CCO)=O)=O)CC2=CC=CC=C2)=O.[Br-].[Br-] | -35.53840283 | -16.82827561 |
| Quat_18_28  | [O-]C(=O)[C@@H]1CCCN1.CC[N+](CC)(CC)CC                                                                   | -4.770752343 | 40.54262008  |
| Imid_21_27  | [Br-].O=C(OCCCCC)Cn1cc[n+](C)c1                                                                          | 5.219057246  | -26.30973151 |
| Imid_81_27  | CN1C=C[N+](C(C(OCCCC)=O)C2=CC=CC=C2)=C1.[Br-]                                                            | -11.25420203 | -25.16620156 |
| Chol_38_27  | OCC[N+](C)(CC(N[C@@H](CC1=CC=CC=C1)C(OCCCCCCCC)=O)=O)C.[Br-]                                             | -8.183564962 | 13.1823941   |
| NI_13_27    | CCOC([C@@H]1CCCN1CC(N[C@H](C(OCC)=O)CC2=CC=CC=C2)=O)=O                                                   | 2.70639416   | 14.27879592  |
| Imid_19_26  | [Br-].O=C(OCCCC)Cn1cc[n+](C)c1                                                                           | 7.3808758    | -26.89103285 |
| Imid_40_26  | CCCCCCCCCN1C=C[N+](=C1)C.[Br-]                                                                           | 2.26724639   | -28.57170362 |
| Imid_13_25  | CCCCCCCCOS(=O)(=O)[O-].CCCCN1C=C[N+](=C1)C                                                               | -5.050833412 | -10.63959349 |



|            |                                                                                                                  |              |              |
|------------|------------------------------------------------------------------------------------------------------------------|--------------|--------------|
| Imid_30_25 | FC(F)(F)S(=O)(=O)[N-]S(=O)(=O)C(F)(F)F.O=C(OCCCC)Cn1cc[n+](C)c1                                                  | 18.92473298  | -23.91726635 |
| Imid_68_25 | CCCCn1cc[n+](C)c1.[O-]C(=O)C(N)Cc1c[NH]cn1                                                                       | -3.098499826 | -29.61180525 |
| Pyri_19_25 | [Cl-].Oc1ccc[n+](COCCCCCCCCCCCCCCCC)c1                                                                           | -19.50277223 | -0.710364989 |
| Pyri_67_25 | [Br-].O\N=C\c1cc[n+](CC(=O)NC(Cc2ccccc2)C(=O)NCCCCCCC)c1                                                         | -25.96267011 | -9.3615767   |
| Imid_20_24 | [Br-].O=C(OCCCC)Cn1cc[n+](C)c1                                                                                   | 6.111804665  | -26.4103544  |
| Pyri_4_24  | [n+]1(cc(O)ccc1)COCCCC.[N-]1C(=O)C=C(C)OS1(=O)=O                                                                 | -27.1276826  | -0.616881688 |
| Pyri_65_24 | [Br-].O\N=C\c1cccc[n+]1CC(=O)NC(Cc1ccccc1)C(=O)NCCCCCCC                                                          | -25.74966581 | -9.99263294  |
| Chol_34_24 | OCC[N+](C)(C)CC(N[C@@H](CC1=CC=CC=C1)C(OCC)=O)=O.[Br-]                                                           | -6.633957165 | 16.75225511  |
| Chol_40_24 | OCC[N+](C)(C)CC(N[C@@H](C(OCCCCCCCCOC([C@H](CC1=CC=CC=C1)NC(C[N+](C)(C)CCO)=O)=O)CC2=CC=CC=C2)=O).[Br-].[Br-]    | -35.70049085 | -16.99681356 |
| Imid_31_23 | [Br-].O=C(OCCCC)Cn1cc[n+](C)c1C                                                                                  | 7.689550567  | -25.71839355 |
| Imid_74_23 | N#CCn1cc[n+](COCC)c1.FC(F)(F)C([O-])=O                                                                           | 13.52647003  | -27.1659266  |
| Prol_1_23  | O=C(C[N@+]1(C)CCC[C@@]1([H])C(OCC)=O)N[C@@H](CC2=CC=CC=C2)C(OC C)=O.[Br-]                                        | -8.851479876 | 17.66663813  |
| Pyri_5_22  | [n+]1(cc(O)ccc1)COCCCC.[N-]1C(=O)C=C(C)OS1(=O)=O                                                                 | -26.8716079  | -0.810481612 |
| Pyri_49_22 | COC1=CC=C[N+](C(C(OCCCC)=O)C2=CC=CC=C2)=C1.[Br-]                                                                 | -16.10014585 | -22.44053131 |
| Quat_22_22 | [O-]C(=O)[C@H]1C[C@H](O)CN1.CC[N+](CC)(CC)CC                                                                     | -4.891199558 | 40.48030188  |
| NI_12_22   | CCOC(=O)[C@H](CC1=CC=CC=C1)NC(=O)CN1CCOCC1                                                                       | 3.286583239  | 13.58462283  |
| Imid_18_21 | [Br-].O=C(OCC)Cn1cc[n+](C)c1                                                                                     | 8.389375289  | -27.43641929 |
| Imid_25_21 | [Br-].O=C(OCCCC)Cn1cc[n+](C)c1                                                                                   | 8.065362064  | -26.9693913  |
| Imid_83_21 | [B-](F)(F)(F)F.CCCCCCCCCN1C=C[N+](=C1)C                                                                          | 1.851733144  | -27.52155556 |
| Pyri_47_21 | O=C(OCCCC)C(C1=CC=CC=C1)[N+]2=CC=CC=C2.[Br-]                                                                     | -15.51920769 | -22.32087062 |
| Chol_35_21 | O=C([C@H](CC1=CC=CC=C1)NC(C[N+](C)(CCO)C)=O)OCCCC.[Br-]                                                          | -7.208918961 | 15.75423992  |
| Quat_5_21  | [N+](CCCC)(CCCC)(CCCC)CCCC.[O-]C(=O)[C@H]1[C@@H](O)[C@H](O)[C@@H](O)C(O)O1                                       | -23.34562278 | 24.77984258  |
| Imid_80_20 | CN1C=C[N+](C(C2=CC=CC=C2)C(OCC)=O)=C1.[Br-]                                                                      | -11.34737908 | -25.77789546 |
| Pyri_15_20 | [n+]1(cc(O)ccc1)COCCCCCCCCCCCCCCCC.[N-]1C(=O)c2ccccc2S1(=O)=O                                                    | -21.02736081 | 0.382189572  |
| Pyri_66_20 | [Br-].O\N=C\c1cc[n+](CC(=O)NC(Cc2ccccc2)C(=O)NCCCCCCC)c1                                                         | -25.69225247 | -9.546902094 |
| Chol_39_20 | OCC[N+](C)(CC(N[C@@H](CC1=CC=CC=C1)C(OCCCCCCCCC)=O)=O)C.[Br-]                                                    | -8.305392165 | 12.74220176  |
| Chol_43_20 | CCOC([C@H](CC1=CC=C(O)C=C1)NC(C[N+](C)(C)CCO)=O)=O.[Br-]                                                         | -6.41603923  | 16.08653388  |
| Imid_67_19 | CCCCn1cc[n+](C)c1.[O-]C(=O)C(N)CS                                                                                | -1.171277995 | -31.57027008 |
| Chol_41_19 | O=C(N[C@@H](CC1=CC=CC=C1)C(OCCCCCCCCCCCCOC([C@H](CC2=CC=CC=C2)NC(C[N+](C)(CCO)C)=O)=O)C[N+](C)(CCO)C.[Br-].[Br-] | -35.92530682 | -17.04818525 |
| Quat_14_19 | [O-]C(=O)C(N)CS.CCCC[N+](CCCC)(CCCC)CCCC                                                                         | -24.5421769  | 27.39599978  |
| Quat_23_19 | [O-]C(=O)[C@H]1C[C@H](O)CN1.CCC[N+](CCC)(CCC)CCC                                                                 | -22.02053121 | 29.78907384  |
| Prol_2_19  | OC([C@]1([H])[N+](CC(N[C@@H](CC2=CC=CC=C2)C(OCC)=O)=O)(C)CCC1)=O.[Br-]                                           | -8.031611944 | 17.75488417  |
| NI_33_19   | C(CCO)CO                                                                                                         | 39.32086504  | 1.918876973  |
| Imid_63_18 | [Br-].COC(=O)Cn1cc[n+](C)c1                                                                                      | 8.453229295  | -24.2223948  |

|            |                                                                                                                      |              |              |
|------------|----------------------------------------------------------------------------------------------------------------------|--------------|--------------|
| Pyri_35_18 | O=C(N[C@@H](CC1=CC=CC=C1)C(OCCCCCCCCCOC([C@H](CC2=CC=CC=C2)NC(C[N+](3=CC=CC=C3)=O)=O)O)C[N+](4=CC=CC=C4).[Br-].[Br-] | -42.36048912 | -21.5566495  |
| Quat_13_18 | CC[N+](CC)(CC)CC.[O-]C(=O)C(N)CS                                                                                     | -2.888488135 | 42.00208458  |
| Quat_20_18 | [O-]C(=O)[C@@H]1CCCN1.CCCC[N+](CCCC)(CCCC)CCCC                                                                       | -23.46003535 | 27.47023114  |
| Imid_7_17  | OC(CN1C=C[N+](CC(N[C@H](C(OCC)=O)CC2=CC=CC=C2)=O)=C1)=O.[Br-]                                                        | -15.70174478 | -11.36439787 |
| Imid_72_17 | [O-]C(=O)C(N)CS.C[n+]1ccn(CCCCC)c1                                                                                   | -1.780875498 | -31.29969502 |
| Morph_2_17 | C[N+](1(CCN[C@@H](CC2=CC=CC=C2)C(OCC)=O)=O)CCOCC1.[Br-]                                                              | -8.061957896 | 16.34886423  |
| Quat_24_17 | [O-]C(=O)[C@@H]1C[C@@H](O)CN1.CCCC[N+](CCCC)(CCCC)CCCC                                                               | -23.04855581 | 27.25669603  |
| NI_21_17   | CCCCCCCCCOC(=O)[C@@H](N)CC1=CC=CC=C1                                                                                 | 1.87442254   | 6.287644503  |
| Imid_27_16 | F[B-](F)(F)F.O=C(OCCC)Cn1cc[n+](C)c1                                                                                 | 5.161745748  | -39.94489    |
| Imid_28_16 | F[P-](F)(F)(F)F.O=C(OCCC)Cn1cc[n+](C)c1                                                                              | 0.915121093  | -44.64956317 |
| Imid_71_16 | SCC(N)C([O-])=O.C[n+]1ccn(CC)c1                                                                                      | -0.822332435 | -32.44186149 |
| Pyri_46_16 | O=C(OCC)C(C1=CC=CC=C1)[N+](2=CC=CC=C2).[Br-]                                                                         | -14.76951928 | -22.74853011 |
| Quat_6_16  | [O-]C(=O)[C@H](C)O.CCCC[N+](CCCC)(CCCC)CCCC                                                                          | -25.20079773 | 27.84350506  |
| Quat_7_16  | [O-]C(=O)[C@@H](O)[C@H](O)C(O)=O.CCCC[N+](CCCC)(CCCC)CCCC                                                            | -24.45771342 | 25.28140203  |
| Quat_29_16 | CCCCCCCCCCCC[N+](C)(C)CC1=CC=CC=C1.[Cl-]                                                                             | -5.22046841  | 6.449501759  |
| NI_32_16   | C(CN)N                                                                                                               | 31.80844271  | 5.056992436  |
| Imid_6_15  | CN1C=C[N+](CC(N[C@@H](CC2=CC=CC=C2)C(OCCCCCCCCC)=O)=O)=C1.[Br-]                                                      | -19.01202302 | -9.145665749 |
| Prol_3_15  | CCOC([C@]1([H])[N+](CC(N[C@@H](CC2=CC=CC=C2)C(O)=O)=O)(C)CCC1)=O.[Br-]                                               | -8.212547527 | 18.02840648  |
| Imid_53_14 | C[N+](1=CN(CCCC)C=C1.O=S(OC)([O-])=O                                                                                 | -0.878756119 | -35.76442664 |
| Pyri_73_14 | C1=CC=[N+](C=C1)CC(=O)NN.[Cl-]                                                                                       | -38.18002562 | 1.73793403   |
| Quat_8_14  | [O-]C(=O)[C@@H](O)CC(=O)O.CCCC[N+](CCCC)(CCCC)CCCC                                                                   | -24.66259543 | 26.05360691  |
| Quat_28_14 | CN(C)C(=O)Oc1cccc(c1)[N+](C)(C)C.COS(=O)(=O)[O-]                                                                     | 7.611167453  | 38.20272429  |
| Pyri_11_13 | [n+](1(cc(O)ccc1)COCCCC.[N-]1C(=O)c2ccccc2S1(=O)=O                                                                   | -23.92854118 | 2.898001218  |
| Quat_11_12 | CC(=O)C([O-])=O.CCCC[N+](CCCC)(CCCC)CCCC                                                                             | -25.88588899 | 27.78355438  |
| NI_22_12   | CCCCCCCCCOC(=O)[C@@H](N)CC1=CC=CC=C1                                                                                 | 0.635182561  | 5.922142868  |
| Phos_2_11  | CCCCCCCCCCCC[P+](CCCCC)(CCCCC)CCCCC.C(=[N-])=NC#N                                                                    | -18.04457474 | 0.62520453   |
| NI_20_11   | CCCCCCCCOC(=O)[C@@H](N)CC1=CC=CC=C1                                                                                  | 3.159369023  | 6.832539934  |
| Quat_10_10 | CCCC[N+](CCCC)(CCCC)CCCC.[O-]C(=O)CC(O)=O                                                                            | -25.50807784 | 27.00677688  |
| NI_66_10   | OC(CN1C=CN=C1)=O                                                                                                     | 27.8093555   | 5.412186     |
| Imid_14_9  | C[N+](1=CN(CCCC)C=C1.F[B-](F)(F)F                                                                                    | 4.105153655  | -39.43945656 |
| Imid_44_9  | [l-].Cc1c(C)[n+](C)cn1CCCCC                                                                                          | 7.742157349  | -34.55209787 |
| Imid_48_9  | CCN1C=C[N+](=C1)C.COS(=O)(=O)[O-]                                                                                    | -0.592001963 | -36.28707034 |
| Imid_55_9  | O=C([O-])C.C[n+]1ccn(CC)c1                                                                                           | 2.190320409  | -34.62361106 |
| Pyri_64_9  | [Br-].O\N=C\c1cc[n+](CC(=O)NC(C)C(=O)NCCCCCCC)cc1                                                                    | -26.6376448  | -7.976537308 |

|           |                                                                                                                                                 |              |              |
|-----------|-------------------------------------------------------------------------------------------------------------------------------------------------|--------------|--------------|
| NI_23_9   | CCCCCCCCCCCCOC(=O)[C@@H](N)CC1=CC=CC=C1                                                                                                         | -0.52044435  | 5.88865173   |
| Pyri_45_8 | O=C(OC)C(C1=CC=CC=C1)[N+] <sub>2</sub> =CC=CC=C2.[Br-]                                                                                          | -14.50632622 | -22.87300101 |
| Quat_4_8  | [Br-].CCCC[N+](CCCC)(CCCC)CCCC                                                                                                                  | -26.38855837 | 28.93680273  |
| Imid_15_7 | C[N+] <sub>1</sub> =CN(CCCC)C=C1.F[P-](F)(F)(F)F                                                                                                | 0.430368311  | -44.65814006 |
| Imid_41_7 | CCN1C=C([N+](=C1C(C)C)C)C.[I-]                                                                                                                  | 7.954015654  | -35.82334259 |
| Pyri_3_7  | CN(C1=CC=[N+](CC(O)=O)C=C1)C.[Br-]                                                                                                              | -37.35228075 | -0.18765785  |
| Pyri_41_7 | O=C(N[C@@H](CC1=CC=CC=C1)C(NCCOCCOCCNC([C@@H](NC(C[N+] <sub>2</sub> =CC=C<br>C=C2)=O)CC3=CC=CC=C3)=O)O)C[N+] <sub>4</sub> =CC=CC=C4.[Br-].[Br-] | -45.42708847 | -20.58478244 |
| Imid_43_6 | [I-].Cc1c(C)n(CC)c[n+] <sub>1</sub> C                                                                                                           | 7.289575961  | -36.03880536 |
| Imid_57_6 | CN1C=CN(CC=C)[CH+] <sub>1</sub> .FC(F)(F)C(C(F)F)O[Al-<br>](OC(C(F)F)C(F)F)(OC(C(F)F)C(F)F)OC(C(F)F)C(F)F)F                                     | 25.6157687   | -26.32774776 |
| Quat_45_6 | C[N+] <sub>1</sub> [(C@@H) <sub>2</sub> C[C@H](C[C@H] <sub>1</sub> [C@H] <sub>3</sub> [C@@H] <sub>2</sub> O3)OC(=O)[C@H](CO)c4<br>cccc4)C.[Br-] | -5.896156388 | 18.44504459  |
| Imid_12_5 | C[N+] <sub>1</sub> =CN(CCCC)C=C1.[Br-]                                                                                                          | 2.65464434   | -33.22758187 |
| Imid_17_5 | CCCCN1C=C[N+](=C1)C.C(F)(F)S(=O)(=O)[N-]S(=O)(=O)C(F)(F)F                                                                                       | 18.93972802  | -23.68362767 |
| Imid_22_5 | [Br-].O=C(ONCCCC)Cn1cc[n+](C)c1                                                                                                                 | 7.40977509   | -28.83942332 |
| Imid_23_5 | [Br-].CCCC(C)OC(=O)Cn1cc[n+](C)c1                                                                                                               | 8.470529195  | -29.75035788 |
| Imid_24_5 | [Br-].CCN(OC(=O)Cn1cc[n+](C)c1)CC                                                                                                               | 8.565056296  | -29.90217676 |
| Imid_38_5 | [N+] <sub>1</sub> (C)=CN(C=C1)CCCCC.[Br-]                                                                                                       | 2.470957238  | -30.92184435 |
| Imid_79_5 | CN1C=C[N+](C(C(OC)=O)C2=CC=CC=C2)=C1.[Br-]                                                                                                      | -11.41154853 | -25.98320699 |
| Pyri_2_5  | COC1=CC=C[N+](CC(O)=O)=C1.[Br-]                                                                                                                 | -38.8336287  | 0.05104749   |
| Pyri_40_5 | O=C(N[C@@H](CC1=CC=CC=C1)C(NCCCCNC([C@H](CC2=CC=CC=C2)NC(C[N+]<br>3=CC=CC=C3)=O)=O)O)C[N+] <sub>4</sub> =CC=CC=C4.[Br-].[Br-]                   | -45.67316044 | -21.7547582  |
| Pyri_72_5 | CC[N+] <sub>1</sub> =CC=CC=C1C.[Br-]                                                                                                            | -39.44051482 | 3.920061398  |
| Chol_33_5 | OCC[N+](C)(C)CC(N[C@@H](CC1=CC=CC=C1)C(O)=O)O.[Br-]                                                                                             | -5.87296979  | 16.9520367   |
| Pyri_75_5 | C[n+] <sub>1</sub> cccc(c1)[C@@H] <sub>2</sub> CCCCN2C.[I-]                                                                                     | -37.29868824 | 5.60233308   |
| NI_74_5   | CCCCN(C=N1)C2=C1C=CC=C2                                                                                                                         | 26.84228748  | 4.953543004  |
| Imid_39_4 | CCN1C=C[N+](=C1)C.[Br-]                                                                                                                         | 3.054699757  | -34.65737554 |
| Pyri_25_4 | O=C(N[C@@H](CC1=CC=CC=C1)C(OCCCCCCCCC)=O)C[N+] <sub>2</sub> =CC=CC=C2.[B<br>r-]                                                                 | -23.198392   | -10.19619441 |
| Pyri_37_4 | O=C(N[C@@H](CC1=CC=CC=C1)C(NCCCCNC([C@H](CC2=CC=CC=C2)NC(C[<br>N+] <sub>3</sub> =CC=CC=C3)=O)=O)O)C[N+] <sub>4</sub> =CC=CC=C4.[Br-].[Br-]      | -45.14805128 | -21.61590389 |
| Pyri_63_4 | [Br-].O\N=C\c1cc[n+](CC(=O)NCCCCCCC)cc1                                                                                                         | -26.86593888 | -7.578806929 |
| Quat_3_4  | [OH-].CCCC[N+](CCCC)(CCCC)CCCC                                                                                                                  | -26.0973948  | 29.16134386  |
| Imid_16_3 | C[N+] <sub>1</sub> =CN(CCCC)C=C1.N#N=C=[N-]                                                                                                     | 5.098085378  | -32.25081259 |
| Imid_59_3 | CN1C=CN(CCCCC)[CH+] <sub>1</sub> .FC(F)(F)C(C(F)F)O[Al-<br>](OC(C(F)F)C(F)F)(OC(C(F)F)C(F)F)OC(C(F)F)C(F)F)F                                    | 25.77987848  | -25.4908823  |
| Imid_87_3 | CCCCCCCCN1C=C[N+](=C1)C.[Br-]                                                                                                                   | 2.420117886  | -29.48328171 |
| Pyri_51_3 | CC[N+] <sub>1</sub> =CC=C(C=C1)C.[Br-]                                                                                                          | -38.69696827 | 3.550510133  |
| Pyri_54_3 | CCCC[N+] <sub>1</sub> =CC=C(C)C=C1.[Cl-]                                                                                                        | -37.50907857 | 4.148742377  |
| Pyri_68_3 | C1=CC=[N+](C=C1)CC(=O)N.[Cl-]                                                                                                                   | -38.63850308 | 1.450906346  |

|           |                                                                                                                                            |              |              |
|-----------|--------------------------------------------------------------------------------------------------------------------------------------------|--------------|--------------|
| Quat_1_3  | [Br-].C[N+](C)(C)C                                                                                                                         | 31.26396589  | 1.964185586  |
| NI_35_3   | C(CO)NCCO                                                                                                                                  | 44.91312804  | 7.155989225  |
| Imid_42_2 | [I-].C[n+] <sub>1</sub> c(C)c(C)n(CC)c <sub>1</sub> C                                                                                      | 7.645882901  | -36.14898815 |
| Imid_60_2 | CN1C=CN(CCO)[CH+] <sub>1</sub> .FC(F)(F)C(C(F)(F)F)O[Al-]<br>](OC(C(F)(F)F)C(F)(F)F)(OC(C(F)(F)F)C(F)(F)F)OC(C(F)(F)F)C(F)(F)F             | 25.38458063  | -25.81991598 |
| Imid_88_2 | CCCCCCCCN1C=C[N+](=C1)C.[Cl-]                                                                                                              | 2.393562255  | -29.4686076  |
| Pyrr_3_2  | CCCC[N+] <sub>1</sub> (CCCC1)C.[Br-]                                                                                                       | 0.633045288  | 46.61144737  |
| Pyri_53_2 | CCCC[N+] <sub>1</sub> =CC=CC=C1.[Br-]                                                                                                      | -37.49149407 | 3.558347648  |
| Thia_2_2  | Cc1c(sc[n+] <sub>1</sub> Cc2cnc(nc2N)C)CCO.Cl.[Cl-]                                                                                        | -11.322466   | -35.07132645 |
| Imid_37_1 | CCN1C=C[N+](=C1)C.[Cl-]                                                                                                                    | 3.064627483  | -34.66972543 |
| Pyri_38_1 | O=C(N[C@@H])(CC1=CC=CC=C1)C(NCCCCCCCCNC([C@H])(CC2=CC=CC=C2)NC(C[N+] <sub>3</sub> =CC=CC=C3)=O)=O)C[N+] <sub>4</sub> =CC=CC=C4.[Br-].[Br-] | -44.78566771 | -22.01736131 |
| Pyri_48_1 | O=C(NCCCC)C(C1=CC=CC=C1)[N+] <sub>2</sub> =CC=CC=C2.[Br-]                                                                                  | -14.7165468  | -21.85081744 |
| Pyri_57_1 | C[n+] <sub>1</sub> cccc(c1)OC(=O)N(C)C.[Br-]                                                                                               | -40.3121591  | -0.195310218 |
| QUAT_44_1 | [Cl-].O[C@H](c1ccc(O)cc1)[C@H](C)[NH2+] <sub>1</sub> CCc1ccc(O)cc1                                                                         | 8.676929266  | 10.00511236  |
| NI_1_1    | c1cc(ccc1C(=O)O)NC(=N)N.Cl                                                                                                                 | 19.71055185  | 2.611205353  |
| NI_2_1    | C1CN2CCN1CC2                                                                                                                               | 39.17510128  | 14.49261952  |
| NI_75_1   | C1CNC(=O)CN1                                                                                                                               | 44.83336269  | 4.900489387  |
| QUAT_39_1 | CCCCCCCCCCCC[N+](C)(C)CC1=CC=CC=C1.[Cl-]                                                                                                   | -5.228526507 | 6.455050801  |
| Imid_61_0 | C[N+] <sub>1</sub> =CN(CC)C=C1.O=S(C(F)(F)F)([O-])=O                                                                                       | 0.138577619  | -36.59875877 |
| Imid_45_0 | [B-](F)(F)(F)F.CCN1C=C[N+](=C1)C                                                                                                           | 4.016217932  | -39.3697372  |
| Imid_46_0 | CCN1C=C[N+](=C1)C.COP(=O)([O-])OC                                                                                                          | 12.38051721  | -34.30187343 |
| Imid_47_0 | CCN1C=C[N+](=C1)C.CCOP(=O)([O-])OCC                                                                                                        | 12.39375976  | -34.28922361 |
| Imid_49_0 | CCN1C=C[N+](=C1)C.CCOS(=O)(=O)[O-]                                                                                                         | -1.191787602 | -36.48579383 |
| Imid_50_0 | CCN1C=C[N+](=C1)C.C(=[N-])=NC#N                                                                                                            | 5.102385036  | -32.4300142  |
| Imid_52_0 | CCN1C=C[N+](=C1)C.F[P-](F)(F)(F)F                                                                                                          | 0.338384676  | -44.82632905 |
| Imid_56_0 | OC(=O)C[n+] <sub>1</sub> ccn(C)c <sub>1</sub> . [Br-]                                                                                      | 2.557453682  | -36.1927116  |
| Imid_62_0 | CCC[N+] <sub>1</sub> =CN(C)C=C1.[I-]                                                                                                       | 3.310197582  | -35.83920519 |
| Imid_82_0 | CN1C=C[N+](C(C(NCCCC)=O)C2=CC=CC=C2)=C1.[Br-]                                                                                              | -10.67128868 | -25.05366756 |
| Imid_86_0 | C[N+] <sub>1</sub> =CN(C=C1)CCO.[Cl-]                                                                                                      | 3.778800971  | -34.67628574 |
| Morph_1_0 | C[N+] <sub>1</sub> (CCCC)CCOCC1.FC(F)(F)C(C(F)(F)F)O[Al-]<br>](OC(C(F)(F)F)C(F)(F)F)(OC(C(F)(F)F)C(F)(F)F)OC(C(F)(F)F)C(F)(F)F             | 26.49163796  | -25.42760241 |
| Pyri_39_0 | O=C(N[C@@H])(CC1=CC=CC=C1)C(NCCCCCCCCNC([C@H])(NC(C[N+] <sub>2</sub> =CC=CC=C2)=O)CC3=CC=CC=C3)=O)C[N+] <sub>4</sub> =CC=CC=C4.[Br-].[Br-] | -44.40229853 | -22.33068803 |
| Pyri_58_0 | C[n+] <sub>1</sub> cccc1/C=N/O.[Cl-]                                                                                                       | -40.94743395 | 3.679844658  |
| Pyri_71_0 | CCCC[N+] <sub>1</sub> =CC=CC(=C1)C.[Br-]                                                                                                   | -36.89739245 | 4.079049046  |
| Quat_2_0  | [Br-].CC[N+](CC)(CC)CC                                                                                                                     | 0.862061895  | 46.35217058  |
| Quat_9_0  | [O-]C(=O)CCC(=O)O.CCCC[N+](CCCC)(CCCC)CCCC                                                                                                 | -25.67603807 | 26.18594175  |

|            |                                                                                                                            |              |              |
|------------|----------------------------------------------------------------------------------------------------------------------------|--------------|--------------|
| Quat_12_0  | <chem>CCCC[N+](CCCC)(CCCC)CCCC.OS(=O)(=O)[O-]</chem>                                                                       | -25.25378522 | 28.83682995  |
| Thia_1_0   | <chem>CC[N+]1=CSC(=C1C)CCO.[Br-]</chem>                                                                                    | -11.32579914 | -35.08336367 |
| NI_25_0    | <chem>CN(CCO)CCO</chem>                                                                                                    | 40.60592914  | 15.94572495  |
| NI_26_0    | <chem>CCN(CCO)CCO</chem>                                                                                                   | 40.28220312  | 16.22604739  |
| NI_27_0    | <chem>C(CO)N(CCO)CCO</chem>                                                                                                | 40.35008266  | 16.86662315  |
| Pipera_1_0 | <chem>O=C(O)C1C[NH2+][CC[NH2+]]1.[Cl-].[Cl-]</chem>                                                                        | 47.07318770  | 6.333133763  |
| Pyri_76_0  | <chem>C[n+]1cc(C2CCC[N+](C)2C)ccc1.[I].[I]</chem>                                                                          | -35.68529422 | 4.388572054  |
| NI_46_0    | <chem>C1=CC=C2C(=C1)C(=O)NS2(=O)=O</chem>                                                                                  | 20.61541965  | 3.762897433  |
| Anion_1_0  | <chem>CC1=CC(=O)[N-]S(=O)(=O)O1.[K+]</chem>                                                                                | 36.90049655  | 5.18098124   |
| QUAT_42_0  | <chem>[Cl-].CC[NH2+][CC]</chem>                                                                                            | 42.83775872  | 6.519943859  |
| NI_67_0    | <chem>C1=CN=CC=C1C(=O)NN</chem>                                                                                            | 22.56985305  | 1.021392412  |
| NI_71_0    | <chem>C1CNCCN1</chem>                                                                                                      | 46.6378824   | 6.658716502  |
| NI_72_0    | <chem>O=C1NCCOC1</chem>                                                                                                    | 44.17138445  | 4.119381808  |
| Piperi_3_0 | <chem>[Cl-].[Cl-].[NH3+]C1CCC[NH2+]C1</chem>                                                                               | 41.49728957  | 8.716321519  |
| NI_76_0    | <chem>C1CC(CNC1)CN</chem>                                                                                                  | 43.80140011  | 9.443238955  |
| NI_77_0    | <chem>C1CCNC(C1)CN</chem>                                                                                                  | 43.83108976  | 10.25770877  |
| NI_80_0    | <chem>C(=O)(C(F)(F)F)O</chem>                                                                                              | 30.03701668  | 5.427030798  |
| Piperi_4_0 | <chem>[Cl-].OC1CC[NH2+][CC1]</chem>                                                                                        | 44.09238591  | 7.28685604   |
| Piperi_5_0 | <chem>[Cl-].OC1(O)CC[NH2+][CC1]</chem>                                                                                     | 43.98849926  | 7.088442595  |
| Imid_58_0  | <chem>CN1C=CN(CCCC)[C+]1C.FC(F)(F)C(C(F)(F)F)O[Al-](OC(C(F)(F)F)C(F)(F)F)(OC(C(F)(F)F)C(F)(F)F)OC(C(F)(F)F)C(F)(F)F</chem> | 26.21137907  | -26.19305015 |

## References

- 1 D. Rogers and M. Hahn, *J. Chem. Inf. Model.*, 2010, **50**, 742–754.
- 2 S. Chakravarti, *Chem. Res. Toxicol.*, 2023, **36**, 959–970.
- 3 S. K. Chakravarti, *ACS omega*, 2018, **3**, 2825–2836.
- 4 J. Friedman, T. Hastie and R. Tibshirani, *J. Stat. Soft.*, 2010, **33**.
- 5 R. Tibshirani, J. Bien, J. Friedman, T. Hastie, N. Simon, J. Taylor and R. J. Tibshirani, *J. R. Statist. Soc. B*, 2012, **74**, 245–266.
- 6 OECD, *Guidance Document on the Validation of (Quantitative) Structure-Activity Relationships [(Q)SAR] Models*, 2007.
- 7 P. Gramatica, *QSAR Comb. Sci.*, 2007, **26**, 694–701.
- 8 P. Gramatica, in *Computational Toxicology. Methods in Molecular Biology*, ed. B. Reisfeld and A. Mayeno, Humana Press, Totowa, NJ, vol 930, pp. 499–526.
